# Supplementary material for: Airborne laser scanning transects over Canada's northern forests: lidar plots for science and application
Source: Copernicus journal article supplement (doi:10.5194/essd-2025-520), 2025-10-06
Supplement: Supplementary file 1 [file Supplement_A-all_point_cloud_metrics.pdf › Supplement_A-all_point_cloud_metrics.pdf]

| Point cloud metric | Height threshold (m) | Return type | Description                                    | Data type    | Link                                                                                                                                                      |
|--------------------|----------------------|-------------|------------------------------------------------|--------------|-----------------------------------------------------------------------------------------------------------------------------------------------------------|
| n                  | 0                    | All returns | Number of returns                              | Long integer | <a href="https://ptompalski.github.io/lidRmetrics/reference/metrics_basic.html">https://ptompalski.github.io/lidRmetrics/reference/metrics_basic.html</a> |
| zmax               | 0                    | All returns | Maximum return height (m)                      | Float        | <a href="https://ptompalski.github.io/lidRmetrics/reference/metrics_basic.html">https://ptompalski.github.io/lidRmetrics/reference/metrics_basic.html</a> |
| zmin               | 0                    | All returns | Minimum return height (m)                      | Float        | <a href="https://ptompalski.github.io/lidRmetrics/reference/metrics_basic.html">https://ptompalski.github.io/lidRmetrics/reference/metrics_basic.html</a> |
| zmean              | 0                    | All returns | Mean of return heights (m)                     | Float        | <a href="https://ptompalski.github.io/lidRmetrics/reference/metrics_basic.html">https://ptompalski.github.io/lidRmetrics/reference/metrics_basic.html</a> |
| zvar               | 0                    | All returns | Variance of return heights (m)                 | Float        | <a href="https://ptompalski.github.io/lidRmetrics/reference/metrics_basic.html">https://ptompalski.github.io/lidRmetrics/reference/metrics_basic.html</a> |
| zsd                | 0                    | All returns | Standard deviation of return heights (m)       | Float        | <a href="https://ptompalski.github.io/lidRmetrics/reference/metrics_basic.html">https://ptompalski.github.io/lidRmetrics/reference/metrics_basic.html</a> |
| zcv                | 0                    | All returns | Coefficient of variation of return heights (%) | Float        | <a href="https://ptompalski.github.io/lidRmetrics/reference/metrics_basic.html">https://ptompalski.github.io/lidRmetrics/reference/metrics_basic.html</a> |
| zskew              | 0                    | All returns | Skewness of return heights                     | Float        | <a href="https://ptompalski.github.io/lidRmetrics/reference/metrics_basic.html">https://ptompalski.github.io/lidRmetrics/reference/metrics_basic.html</a> |
| zkurt              | 0                    | All returns | Kurtosis of return heights                     | Float        | <a href="https://ptompalski.github.io/lidRmetrics/reference/metrics_basic.html">https://ptompalski.github.io/lidRmetrics/reference/metrics_basic.html</a> |
| n_return_1         | 0                    | All returns | Number of returns by each return number        | Long integer | <a href="https://ptompalski.github.io/lidRmetrics/reference/metrics_echo2.html">https://ptompalski.github.io/lidRmetrics/reference/metrics_echo2.html</a> |
| n_return_2         | 0                    | All returns | Number of returns by each return number        | Long integer | <a href="https://ptompalski.github.io/lidRmetrics/reference/metrics_echo2.html">https://ptompalski.github.io/lidRmetrics/reference/metrics_echo2.html</a> |
| n_return_3         | 0                    | All returns | Number of returns by each return number        | Long integer | <a href="https://ptompalski.github.io/lidRmetrics/reference/metrics_echo2.html">https://ptompalski.github.io/lidRmetrics/reference/metrics_echo2.html</a> |
| n_return_4         | 0                    | All returns | Number of returns by each return number        | Long integer | <a href="https://ptompalski.github.io/lidRmetrics/reference/metrics_echo2.html">https://ptompalski.github.io/lidRmetrics/reference/metrics_echo2.html</a> |
| n_return_5         | 0                    | All returns | Number of returns by each return number        | Long integer | <a href="https://ptompalski.github.io/lidRmetrics/reference/metrics_echo2.html">https://ptompalski.github.io/lidRmetrics/reference/metrics_echo2.html</a> |
| n_return_6         | 0                    | All returns | Number of returns by each return number        | Long integer | <a href="https://ptompalski.github.io/lidRmetrics/reference/metrics_echo2.html">https://ptompalski.github.io/lidRmetrics/reference/metrics_echo2.html</a> |
| n_return_7         | 0                    | All returns | Number of returns by each return number        | Long integer | <a href="https://ptompalski.github.io/lidRmetrics/reference/metrics_echo2.html">https://ptompalski.github.io/lidRmetrics/reference/metrics_echo2.html</a> |
| n_return_8         | 0                    | All returns | Number of returns by each return number        | Long integer | <a href="https://ptompalski.github.io/lidRmetrics/reference/metrics_echo2.html">https://ptompalski.github.io/lidRmetrics/reference/metrics_echo2.html</a> |
| n_return_9         | 0                    | All returns | Number of returns by each return number        | Long integer | <a href="https://ptompalski.github.io/lidRmetrics/reference/metrics_echo2.html">https://ptompalski.github.io/lidRmetrics/reference/metrics_echo2.html</a> |
| n_first            | 0                    | All returns | Number of first returns                        | Long integer | <a href="https://ptompalski.github.io/lidRmetrics/reference/metrics_echo.html">https://ptompalski.github.io/lidRmetrics/reference/metrics_echo.html</a>   |
| n_intermediate     | 0                    | All returns | Number of intermediate returns                 | Long integer | <a href="https://ptompalski.github.io/lidRmetrics/reference/metrics_echo.html">https://ptompalski.github.io/lidRmetrics/reference/metrics_echo.html</a>   |
| n_last             | 0                    | All returns | Number of last returns                         | Long integer | <a href="https://ptompalski.github.io/lidRmetrics/reference/metrics_echo.html">https://ptompalski.github.io/lidRmetrics/reference/metrics_echo.html</a>   |

UNCLASSIFIED - NON CLASSIFIÉ

|                          |   |             |                                                         |              |                                                                                                                                                                       |
|--------------------------|---|-------------|---------------------------------------------------------|--------------|-----------------------------------------------------------------------------------------------------------------------------------------------------------------------|
| n_single                 | 0 | All returns | Number of single returns                                | Long integer | <a href="https://ptompalski.github.io/lidRmetrics/reference/metrics_echo.html">https://ptompalski.github.io/lidRmetrics/reference/metrics_echo.html</a>               |
| n_multiple               | 0 | All returns | Number of multiple returns                              | Long integer | <a href="https://ptompalski.github.io/lidRmetrics/reference/metrics_echo.html">https://ptompalski.github.io/lidRmetrics/reference/metrics_echo.html</a>               |
| p_first                  | 0 | All returns | Percentage of returns that are first returns (%)        | Float        | <a href="https://ptompalski.github.io/lidRmetrics/reference/metrics_echo.html">https://ptompalski.github.io/lidRmetrics/reference/metrics_echo.html</a>               |
| p_intermediate           | 0 | All returns | Percentage of returns that are intermediate returns (%) | Float        | <a href="https://ptompalski.github.io/lidRmetrics/reference/metrics_echo.html">https://ptompalski.github.io/lidRmetrics/reference/metrics_echo.html</a>               |
| p_last                   | 0 | All returns | Percentage of returns that are last returns (%)         | Float        | <a href="https://ptompalski.github.io/lidRmetrics/reference/metrics_echo.html">https://ptompalski.github.io/lidRmetrics/reference/metrics_echo.html</a>               |
| p_single                 | 0 | All returns | Percentage of returns that are single returns (%)       | Float        | <a href="https://ptompalski.github.io/lidRmetrics/reference/metrics_echo.html">https://ptompalski.github.io/lidRmetrics/reference/metrics_echo.html</a>               |
| p_multiple               | 0 | All returns | Percentage of returns that are multiple returns (%)     | Float        | <a href="https://ptompalski.github.io/lidRmetrics/reference/metrics_echo.html">https://ptompalski.github.io/lidRmetrics/reference/metrics_echo.html</a>               |
| ratio_last_first         | 0 | All returns | Ratio of last returns to first returns                  | Float        | <a href="https://ptompalski.github.io/lidRmetrics/reference/metrics_echo.html">https://ptompalski.github.io/lidRmetrics/reference/metrics_echo.html</a>               |
| ratio_intermediate_first | 0 | All returns | Ratio of intermediate returns to first returns          | Float        | <a href="https://ptompalski.github.io/lidRmetrics/reference/metrics_echo.html">https://ptompalski.github.io/lidRmetrics/reference/metrics_echo.html</a>               |
| ratio_multiple_single    | 0 | All returns | Ratio of multiple returns to single returns             | Float        | <a href="https://ptompalski.github.io/lidRmetrics/reference/metrics_echo.html">https://ptompalski.github.io/lidRmetrics/reference/metrics_echo.html</a>               |
| zq1                      | 0 | All returns | Height percentile (m)                                   | Float        | <a href="https://ptompalski.github.io/lidRmetrics/reference/metrics_percentiles.html">https://ptompalski.github.io/lidRmetrics/reference/metrics_percentiles.html</a> |
| zq5                      | 0 | All returns | Height percentile (m)                                   | Float        | <a href="https://ptompalski.github.io/lidRmetrics/reference/metrics_percentiles.html">https://ptompalski.github.io/lidRmetrics/reference/metrics_percentiles.html</a> |
| zq10                     | 0 | All returns | Height percentile (m)                                   | Float        | <a href="https://ptompalski.github.io/lidRmetrics/reference/metrics_percentiles.html">https://ptompalski.github.io/lidRmetrics/reference/metrics_percentiles.html</a> |
| zq15                     | 0 | All returns | Height percentile (m)                                   | Float        | <a href="https://ptompalski.github.io/lidRmetrics/reference/metrics_percentiles.html">https://ptompalski.github.io/lidRmetrics/reference/metrics_percentiles.html</a> |
| zq20                     | 0 | All returns | Height percentile (m)                                   | Float        | <a href="https://ptompalski.github.io/lidRmetrics/reference/metrics_percentiles.html">https://ptompalski.github.io/lidRmetrics/reference/metrics_percentiles.html</a> |
| zq25                     | 0 | All returns | Height percentile (m)                                   | Float        | <a href="https://ptompalski.github.io/lidRmetrics/reference/metrics_percentiles.html">https://ptompalski.github.io/lidRmetrics/reference/metrics_percentiles.html</a> |
| zq30                     | 0 | All returns | Height percentile (m)                                   | Float        | <a href="https://ptompalski.github.io/lidRmetrics/reference/metrics_percentiles.html">https://ptompalski.github.io/lidRmetrics/reference/metrics_percentiles.html</a> |
| zq35                     | 0 | All returns | Height percentile (m)                                   | Float        | <a href="https://ptompalski.github.io/lidRmetrics/reference/metrics_percentiles.html">https://ptompalski.github.io/lidRmetrics/reference/metrics_percentiles.html</a> |
| zq40                     | 0 | All returns | Height percentile (m)                                   | Float        | <a href="https://ptompalski.github.io/lidRmetrics/reference/metrics_percentiles.html">https://ptompalski.github.io/lidRmetrics/reference/metrics_percentiles.html</a> |
| zq45                     | 0 | All returns | Height percentile (m)                                   | Float        | <a href="https://ptompalski.github.io/lidRmetrics/reference/metrics_percentiles.html">https://ptompalski.github.io/lidRmetrics/reference/metrics_percentiles.html</a> |
| zq50                     | 0 | All returns | Height percentile (m)                                   | Float        | <a href="https://ptompalski.github.io/lidRmetrics/reference/metrics_percentiles.html">https://ptompalski.github.io/lidRmetrics/reference/metrics_percentiles.html</a> |
| zq55                     | 0 | All returns | Height percentile (m)                                   | Float        | <a href="https://ptompalski.github.io/lidRmetrics/reference/metrics_percentiles.html">https://ptompalski.github.io/lidRmetrics/reference/metrics_percentiles.html</a> |

|             |   |             |                                                                           |       |                                                                                                                                                                           |
|-------------|---|-------------|---------------------------------------------------------------------------|-------|---------------------------------------------------------------------------------------------------------------------------------------------------------------------------|
| zq60        | 0 | All returns | Height percentile (m)                                                     | Float | <a href="https://ptompalski.github.io/lidRmetrics/reference/metrics_percentiles.html">https://ptompalski.github.io/lidRmetrics/reference/metrics_percentiles.html</a>     |
| zq65        | 0 | All returns | Height percentile (m)                                                     | Float | <a href="https://ptompalski.github.io/lidRmetrics/reference/metrics_percentiles.html">https://ptompalski.github.io/lidRmetrics/reference/metrics_percentiles.html</a>     |
| zq70        | 0 | All returns | Height percentile (m)                                                     | Float | <a href="https://ptompalski.github.io/lidRmetrics/reference/metrics_percentiles.html">https://ptompalski.github.io/lidRmetrics/reference/metrics_percentiles.html</a>     |
| zq75        | 0 | All returns | Height percentile (m)                                                     | Float | <a href="https://ptompalski.github.io/lidRmetrics/reference/metrics_percentiles.html">https://ptompalski.github.io/lidRmetrics/reference/metrics_percentiles.html</a>     |
| zq80        | 0 | All returns | Height percentile (m)                                                     | Float | <a href="https://ptompalski.github.io/lidRmetrics/reference/metrics_percentiles.html">https://ptompalski.github.io/lidRmetrics/reference/metrics_percentiles.html</a>     |
| zq85        | 0 | All returns | Height percentile (m)                                                     | Float | <a href="https://ptompalski.github.io/lidRmetrics/reference/metrics_percentiles.html">https://ptompalski.github.io/lidRmetrics/reference/metrics_percentiles.html</a>     |
| zq90        | 0 | All returns | Height percentile (m)                                                     | Float | <a href="https://ptompalski.github.io/lidRmetrics/reference/metrics_percentiles.html">https://ptompalski.github.io/lidRmetrics/reference/metrics_percentiles.html</a>     |
| zq95        | 0 | All returns | Height percentile (m)                                                     | Float | <a href="https://ptompalski.github.io/lidRmetrics/reference/metrics_percentiles.html">https://ptompalski.github.io/lidRmetrics/reference/metrics_percentiles.html</a>     |
| zq99        | 0 | All returns | Height percentile (m)                                                     | Float | <a href="https://ptompalski.github.io/lidRmetrics/reference/metrics_percentiles.html">https://ptompalski.github.io/lidRmetrics/reference/metrics_percentiles.html</a>     |
| pzabovemean | 0 | All returns | Percentage of returns above mean return height (%)                        | Float | <a href="https://ptompalski.github.io/lidRmetrics/reference/metrics_percabove.html">https://ptompalski.github.io/lidRmetrics/reference/metrics_percabove.html</a>         |
| pzabove2    | 0 | All returns | Percentage of returns above 2 m (%)                                       | Float | <a href="https://ptompalski.github.io/lidRmetrics/reference/metrics_percabove.html">https://ptompalski.github.io/lidRmetrics/reference/metrics_percabove.html</a>         |
| pzabove5    | 0 | All returns | Percentage of returns above 5 m (%)                                       | Float | <a href="https://ptompalski.github.io/lidRmetrics/reference/metrics_percabove.html">https://ptompalski.github.io/lidRmetrics/reference/metrics_percabove.html</a>         |
| ziqr        | 0 | All returns | Interquartile range (m)                                                   | Float | <a href="https://ptompalski.github.io/lidRmetrics/reference/metrics_dispersion.html">https://ptompalski.github.io/lidRmetrics/reference/metrics_dispersion.html</a>       |
| zMADmean    | 0 | All returns | Mean absolute deviation of return heights (m)                             | Float | <a href="https://ptompalski.github.io/lidRmetrics/reference/metrics_dispersion.html">https://ptompalski.github.io/lidRmetrics/reference/metrics_dispersion.html</a>       |
| zMADmedian  | 0 | All returns | Median absolute deviation of return heights (m)                           | Float | <a href="https://ptompalski.github.io/lidRmetrics/reference/metrics_dispersion.html">https://ptompalski.github.io/lidRmetrics/reference/metrics_dispersion.html</a>       |
| CRR         | 0 | All returns | Canopy relief ratio                                                       | Float | <a href="https://ptompalski.github.io/lidRmetrics/reference/metrics_dispersion.html">https://ptompalski.github.io/lidRmetrics/reference/metrics_dispersion.html</a>       |
| zentropy    | 0 | All returns | A normalized Shannon vertical complexity index                            | Float | <a href="https://ptompalski.github.io/lidRmetrics/reference/metrics_dispersion.html">https://ptompalski.github.io/lidRmetrics/reference/metrics_dispersion.html</a>       |
| VCI         | 0 | All returns | Vertical complexity index                                                 | Float | <a href="https://ptompalski.github.io/lidRmetrics/reference/metrics_dispersion.html">https://ptompalski.github.io/lidRmetrics/reference/metrics_dispersion.html</a>       |
| zpcum1      | 0 | All returns | Cumulative proportion of returns found in nine equal height intervals (%) | Float | <a href="https://ptompalski.github.io/lidRmetrics/reference/metrics_canopydensity.html">https://ptompalski.github.io/lidRmetrics/reference/metrics_canopydensity.html</a> |
| zpcum2      | 0 | All returns | Cumulative proportion of returns found in nine equal height intervals (%) | Float | <a href="https://ptompalski.github.io/lidRmetrics/reference/metrics_canopydensity.html">https://ptompalski.github.io/lidRmetrics/reference/metrics_canopydensity.html</a> |
| zpcum3      | 0 | All returns | Cumulative proportion of returns found in nine equal height intervals (%) | Float | <a href="https://ptompalski.github.io/lidRmetrics/reference/metrics_canopydensity.html">https://ptompalski.github.io/lidRmetrics/reference/metrics_canopydensity.html</a> |
| zpcum4      | 0 | All returns | Cumulative proportion of returns found in nine equal height intervals (%) | Float | <a href="https://ptompalski.github.io/lidRmetrics/reference/metrics_canopydensity.html">https://ptompalski.github.io/lidRmetrics/reference/metrics_canopydensity.html</a> |

|            |   |             |                                                                                         |       |                                                                                                                                                                           |
|------------|---|-------------|-----------------------------------------------------------------------------------------|-------|---------------------------------------------------------------------------------------------------------------------------------------------------------------------------|
| zpcum5     | 0 | All returns | Cumulative proportion of returns found in nine equal height intervals (%)               | Float | <a href="https://ptompalski.github.io/lidRmetrics/reference/metrics_canopydensity.html">https://ptompalski.github.io/lidRmetrics/reference/metrics_canopydensity.html</a> |
| zpcum6     | 0 | All returns | Cumulative proportion of returns found in nine equal height intervals (%)               | Float | <a href="https://ptompalski.github.io/lidRmetrics/reference/metrics_canopydensity.html">https://ptompalski.github.io/lidRmetrics/reference/metrics_canopydensity.html</a> |
| zpcum7     | 0 | All returns | Cumulative proportion of returns found in nine equal height intervals (%)               | Float | <a href="https://ptompalski.github.io/lidRmetrics/reference/metrics_canopydensity.html">https://ptompalski.github.io/lidRmetrics/reference/metrics_canopydensity.html</a> |
| zpcum8     | 0 | All returns | Cumulative proportion of returns found in nine equal height intervals (%)               | Float | <a href="https://ptompalski.github.io/lidRmetrics/reference/metrics_canopydensity.html">https://ptompalski.github.io/lidRmetrics/reference/metrics_canopydensity.html</a> |
| zpcum9     | 0 | All returns | Cumulative proportion of returns found in nine equal height intervals (%)               | Float | <a href="https://ptompalski.github.io/lidRmetrics/reference/metrics_canopydensity.html">https://ptompalski.github.io/lidRmetrics/reference/metrics_canopydensity.html</a> |
| L1         | 0 | All returns | L-moment, mean                                                                          | Float | <a href="https://ptompalski.github.io/lidRmetrics/reference/metrics_Lmoments.html">https://ptompalski.github.io/lidRmetrics/reference/metrics_Lmoments.html</a>           |
| L2         | 0 | All returns | L-moment, variance                                                                      | Float | <a href="https://ptompalski.github.io/lidRmetrics/reference/metrics_Lmoments.html">https://ptompalski.github.io/lidRmetrics/reference/metrics_Lmoments.html</a>           |
| L3         | 0 | All returns | L-moment, skewness                                                                      | Float | <a href="https://ptompalski.github.io/lidRmetrics/reference/metrics_Lmoments.html">https://ptompalski.github.io/lidRmetrics/reference/metrics_Lmoments.html</a>           |
| L4         | 0 | All returns | L-moment, kurtosis                                                                      | Float | <a href="https://ptompalski.github.io/lidRmetrics/reference/metrics_Lmoments.html">https://ptompalski.github.io/lidRmetrics/reference/metrics_Lmoments.html</a>           |
| Lskew      | 0 | All returns | L-moment ratio, skewness                                                                | Float | <a href="https://ptompalski.github.io/lidRmetrics/reference/metrics_Lmoments.html">https://ptompalski.github.io/lidRmetrics/reference/metrics_Lmoments.html</a>           |
| Lkurt      | 0 | All returns | L-moment ratio, kurtosis                                                                | Float | <a href="https://ptompalski.github.io/lidRmetrics/reference/metrics_Lmoments.html">https://ptompalski.github.io/lidRmetrics/reference/metrics_Lmoments.html</a>           |
| Lcoefvar   | 0 | All returns | L-moment ratio, coefficient of variation                                                | Float | <a href="https://ptompalski.github.io/lidRmetrics/reference/metrics_Lmoments.html">https://ptompalski.github.io/lidRmetrics/reference/metrics_Lmoments.html</a>           |
| lad_min    | 0 | All returns | Leaf area density, minimum                                                              | Float | <a href="https://ptompalski.github.io/lidRmetrics/reference/metrics_lad.html">https://ptompalski.github.io/lidRmetrics/reference/metrics_lad.html</a>                     |
| lad_max    | 0 | All returns | Leaf area density, maximum                                                              | Float | <a href="https://ptompalski.github.io/lidRmetrics/reference/metrics_lad.html">https://ptompalski.github.io/lidRmetrics/reference/metrics_lad.html</a>                     |
| lad_mean   | 0 | All returns | Leaf area density, mean                                                                 | Float | <a href="https://ptompalski.github.io/lidRmetrics/reference/metrics_lad.html">https://ptompalski.github.io/lidRmetrics/reference/metrics_lad.html</a>                     |
| lad_cv     | 0 | All returns | Leaf area density, coefficient of variation                                             | Float | <a href="https://ptompalski.github.io/lidRmetrics/reference/metrics_lad.html">https://ptompalski.github.io/lidRmetrics/reference/metrics_lad.html</a>                     |
| lad_sum    | 0 | All returns | Leaf area density, sum                                                                  | Float | <a href="https://ptompalski.github.io/lidRmetrics/reference/metrics_lad.html">https://ptompalski.github.io/lidRmetrics/reference/metrics_lad.html</a>                     |
| pz_below_0 | 0 | All returns | Percentage of points calculated for a set of horizontal layers ( $\leq 0$ ) (%)         | Float | <a href="https://ptompalski.github.io/lidRmetrics/reference/metrics_interval.html">https://ptompalski.github.io/lidRmetrics/reference/metrics_interval.html</a>           |
| pz_0_1     | 0 | All returns | Percentage of points calculated for a set of horizontal layers ( $> 0$ & $\leq 1$ ) (%) | Float | <a href="https://ptompalski.github.io/lidRmetrics/reference/metrics_interval.html">https://ptompalski.github.io/lidRmetrics/reference/metrics_interval.html</a>           |
| pz_1_2     | 0 | All returns | Percentage of points calculated for a set of horizontal layers (%)                      | Float | <a href="https://ptompalski.github.io/lidRmetrics/reference/metrics_interval.html">https://ptompalski.github.io/lidRmetrics/reference/metrics_interval.html</a>           |
| pz_2_3     | 0 | All returns | Percentage of points calculated for a set of horizontal layers (%)                      | Float | <a href="https://ptompalski.github.io/lidRmetrics/reference/metrics_interval.html">https://ptompalski.github.io/lidRmetrics/reference/metrics_interval.html</a>           |
| pz_3_4     | 0 | All returns | Percentage of points calculated for a set of horizontal layers (%)                      | Float | <a href="https://ptompalski.github.io/lidRmetrics/reference/metrics_interval.html">https://ptompalski.github.io/lidRmetrics/reference/metrics_interval.html</a>           |

|                 |   |             |                                                                    |       |                                                                                                                                                                 |
|-----------------|---|-------------|--------------------------------------------------------------------|-------|-----------------------------------------------------------------------------------------------------------------------------------------------------------------|
| pz_4_5          | 0 | All returns | Percentage of points calculated for a set of horizontal layers (%) | Float | <a href="https://ptompalski.github.io/lidRmetrics/reference/metrics_interval.html">https://ptompalski.github.io/lidRmetrics/reference/metrics_interval.html</a> |
| pz_5_6          | 0 | All returns | Percentage of points calculated for a set of horizontal layers (%) | Float | <a href="https://ptompalski.github.io/lidRmetrics/reference/metrics_interval.html">https://ptompalski.github.io/lidRmetrics/reference/metrics_interval.html</a> |
| pz_6_7          | 0 | All returns | Percentage of points calculated for a set of horizontal layers (%) | Float | <a href="https://ptompalski.github.io/lidRmetrics/reference/metrics_interval.html">https://ptompalski.github.io/lidRmetrics/reference/metrics_interval.html</a> |
| pz_7_8          | 0 | All returns | Percentage of points calculated for a set of horizontal layers (%) | Float | <a href="https://ptompalski.github.io/lidRmetrics/reference/metrics_interval.html">https://ptompalski.github.io/lidRmetrics/reference/metrics_interval.html</a> |
| pz_8_9          | 0 | All returns | Percentage of points calculated for a set of horizontal layers (%) | Float | <a href="https://ptompalski.github.io/lidRmetrics/reference/metrics_interval.html">https://ptompalski.github.io/lidRmetrics/reference/metrics_interval.html</a> |
| pz_9_10         | 0 | All returns | Percentage of points calculated for a set of horizontal layers (%) | Float | <a href="https://ptompalski.github.io/lidRmetrics/reference/metrics_interval.html">https://ptompalski.github.io/lidRmetrics/reference/metrics_interval.html</a> |
| pz_10_15        | 0 | All returns | Percentage of points calculated for a set of horizontal layers (%) | Float | <a href="https://ptompalski.github.io/lidRmetrics/reference/metrics_interval.html">https://ptompalski.github.io/lidRmetrics/reference/metrics_interval.html</a> |
| pz_15_20        | 0 | All returns | Percentage of points calculated for a set of horizontal layers (%) | Float | <a href="https://ptompalski.github.io/lidRmetrics/reference/metrics_interval.html">https://ptompalski.github.io/lidRmetrics/reference/metrics_interval.html</a> |
| pz_20_25        | 0 | All returns | Percentage of points calculated for a set of horizontal layers (%) | Float | <a href="https://ptompalski.github.io/lidRmetrics/reference/metrics_interval.html">https://ptompalski.github.io/lidRmetrics/reference/metrics_interval.html</a> |
| pz_25_30        | 0 | All returns | Percentage of points calculated for a set of horizontal layers (%) | Float | <a href="https://ptompalski.github.io/lidRmetrics/reference/metrics_interval.html">https://ptompalski.github.io/lidRmetrics/reference/metrics_interval.html</a> |
| pz_30_35        | 0 | All returns | Percentage of points calculated for a set of horizontal layers (%) | Float | <a href="https://ptompalski.github.io/lidRmetrics/reference/metrics_interval.html">https://ptompalski.github.io/lidRmetrics/reference/metrics_interval.html</a> |
| pz_35_40        | 0 | All returns | Percentage of points calculated for a set of horizontal layers (%) | Float | <a href="https://ptompalski.github.io/lidRmetrics/reference/metrics_interval.html">https://ptompalski.github.io/lidRmetrics/reference/metrics_interval.html</a> |
| pz_40_45        | 0 | All returns | Percentage of points calculated for a set of horizontal layers (%) | Float | <a href="https://ptompalski.github.io/lidRmetrics/reference/metrics_interval.html">https://ptompalski.github.io/lidRmetrics/reference/metrics_interval.html</a> |
| pz_45_50        | 0 | All returns | Percentage of points calculated for a set of horizontal layers (%) | Float | <a href="https://ptompalski.github.io/lidRmetrics/reference/metrics_interval.html">https://ptompalski.github.io/lidRmetrics/reference/metrics_interval.html</a> |
| pz_above_50     | 0 | All returns | Percentage of points calculated for a set of horizontal layers (%) | Float | <a href="https://ptompalski.github.io/lidRmetrics/reference/metrics_interval.html">https://ptompalski.github.io/lidRmetrics/reference/metrics_interval.html</a> |
| rumple          | 0 | All returns | Ratio of 3D canopy surface area to 2D terrain surface area         | Float | <a href="https://ptompalski.github.io/lidRmetrics/reference/metrics_rumple.html">https://ptompalski.github.io/lidRmetrics/reference/metrics_rumple.html</a>     |
| kde_peaks_count | 0 | All returns | Kernel density estimation metric                                   | Float | <a href="https://ptompalski.github.io/lidRmetrics/reference/metrics_kde.html">https://ptompalski.github.io/lidRmetrics/reference/metrics_kde.html</a>           |
| kde_peak1_elev  | 0 | All returns | Kernel density estimation metric                                   | Float | <a href="https://ptompalski.github.io/lidRmetrics/reference/metrics_kde.html">https://ptompalski.github.io/lidRmetrics/reference/metrics_kde.html</a>           |
| kde_peak2_elev  | 0 | All returns | Kernel density estimation metric                                   | Float | <a href="https://ptompalski.github.io/lidRmetrics/reference/metrics_kde.html">https://ptompalski.github.io/lidRmetrics/reference/metrics_kde.html</a>           |
| kde_peak3_elev  | 0 | All returns | Kernel density estimation metric                                   | Float | <a href="https://ptompalski.github.io/lidRmetrics/reference/metrics_kde.html">https://ptompalski.github.io/lidRmetrics/reference/metrics_kde.html</a>           |
| kde_peak4_elev  | 0 | All returns | Kernel density estimation metric                                   | Float | <a href="https://ptompalski.github.io/lidRmetrics/reference/metrics_kde.html">https://ptompalski.github.io/lidRmetrics/reference/metrics_kde.html</a>           |
| kde_peak1_value | 0 | All returns | Kernel density estimation metric                                   | Float | <a href="https://ptompalski.github.io/lidRmetrics/reference/metrics_kde.html">https://ptompalski.github.io/lidRmetrics/reference/metrics_kde.html</a>           |

|                   |   |             |                                                |              |                                                                                                                                                           |
|-------------------|---|-------------|------------------------------------------------|--------------|-----------------------------------------------------------------------------------------------------------------------------------------------------------|
| kde_peak2_value   | 0 | All returns | Kernel density estimation metric               | Float        | <a href="https://ptompalski.github.io/lidRmetrics/reference/metrics_kde.html">https://ptompalski.github.io/lidRmetrics/reference/metrics_kde.html</a>     |
| kde_peak3_value   | 0 | All returns | Kernel density estimation metric               | Float        | <a href="https://ptompalski.github.io/lidRmetrics/reference/metrics_kde.html">https://ptompalski.github.io/lidRmetrics/reference/metrics_kde.html</a>     |
| kde_peak4_value   | 0 | All returns | Kernel density estimation metric               | Float        | <a href="https://ptompalski.github.io/lidRmetrics/reference/metrics_kde.html">https://ptompalski.github.io/lidRmetrics/reference/metrics_kde.html</a>     |
| kde_peak1_diff    | 0 | All returns | Kernel density estimation metric               | Float        | <a href="https://ptompalski.github.io/lidRmetrics/reference/metrics_kde.html">https://ptompalski.github.io/lidRmetrics/reference/metrics_kde.html</a>     |
| kde_peak2_diff    | 0 | All returns | Kernel density estimation metric               | Float        | <a href="https://ptompalski.github.io/lidRmetrics/reference/metrics_kde.html">https://ptompalski.github.io/lidRmetrics/reference/metrics_kde.html</a>     |
| kde_peak3_diff    | 0 | All returns | Kernel density estimation metric               | Float        | <a href="https://ptompalski.github.io/lidRmetrics/reference/metrics_kde.html">https://ptompalski.github.io/lidRmetrics/reference/metrics_kde.html</a>     |
| n_above2          | 2 | All returns | Number of returns                              | Long integer | <a href="https://ptompalski.github.io/lidRmetrics/reference/metrics_basic.html">https://ptompalski.github.io/lidRmetrics/reference/metrics_basic.html</a> |
| zmax_above2       | 2 | All returns | Maximum return height (m)                      | Float        | <a href="https://ptompalski.github.io/lidRmetrics/reference/metrics_basic.html">https://ptompalski.github.io/lidRmetrics/reference/metrics_basic.html</a> |
| zmin_above2       | 2 | All returns | Minimum return height (m)                      | Float        | <a href="https://ptompalski.github.io/lidRmetrics/reference/metrics_basic.html">https://ptompalski.github.io/lidRmetrics/reference/metrics_basic.html</a> |
| zmean_above2      | 2 | All returns | Mean of return heights (m)                     | Float        | <a href="https://ptompalski.github.io/lidRmetrics/reference/metrics_basic.html">https://ptompalski.github.io/lidRmetrics/reference/metrics_basic.html</a> |
| zvar_above2       | 2 | All returns | Variance of return heights (m)                 | Float        | <a href="https://ptompalski.github.io/lidRmetrics/reference/metrics_basic.html">https://ptompalski.github.io/lidRmetrics/reference/metrics_basic.html</a> |
| zsd_above2        | 2 | All returns | Standard deviation of return heights (m)       | Float        | <a href="https://ptompalski.github.io/lidRmetrics/reference/metrics_basic.html">https://ptompalski.github.io/lidRmetrics/reference/metrics_basic.html</a> |
| zcv_above2        | 2 | All returns | Coefficeint of variation of return heights (%) | Float        | <a href="https://ptompalski.github.io/lidRmetrics/reference/metrics_basic.html">https://ptompalski.github.io/lidRmetrics/reference/metrics_basic.html</a> |
| zskew_above2      | 2 | All returns | Skewness of return heights                     | Float        | <a href="https://ptompalski.github.io/lidRmetrics/reference/metrics_basic.html">https://ptompalski.github.io/lidRmetrics/reference/metrics_basic.html</a> |
| zkurt_above2      | 2 | All returns | Kurtosis of return heights                     | Float        | <a href="https://ptompalski.github.io/lidRmetrics/reference/metrics_basic.html">https://ptompalski.github.io/lidRmetrics/reference/metrics_basic.html</a> |
| n_return_1_above2 | 2 | All returns | Number of returns by each return number        | Long integer | <a href="https://ptompalski.github.io/lidRmetrics/reference/metrics_echo2.html">https://ptompalski.github.io/lidRmetrics/reference/metrics_echo2.html</a> |
| n_return_2_above2 | 2 | All returns | Number of returns by each return number        | Long integer | <a href="https://ptompalski.github.io/lidRmetrics/reference/metrics_echo2.html">https://ptompalski.github.io/lidRmetrics/reference/metrics_echo2.html</a> |
| n_return_3_above2 | 2 | All returns | Number of returns by each return number        | Long integer | <a href="https://ptompalski.github.io/lidRmetrics/reference/metrics_echo2.html">https://ptompalski.github.io/lidRmetrics/reference/metrics_echo2.html</a> |
| n_return_4_above2 | 2 | All returns | Number of returns by each return number        | Long integer | <a href="https://ptompalski.github.io/lidRmetrics/reference/metrics_echo2.html">https://ptompalski.github.io/lidRmetrics/reference/metrics_echo2.html</a> |
| n_return_5_above2 | 2 | All returns | Number of returns by each return number        | Long integer | <a href="https://ptompalski.github.io/lidRmetrics/reference/metrics_echo2.html">https://ptompalski.github.io/lidRmetrics/reference/metrics_echo2.html</a> |
| n_return_6_above2 | 2 | All returns | Number of returns by each return number        | Long integer | <a href="https://ptompalski.github.io/lidRmetrics/reference/metrics_echo2.html">https://ptompalski.github.io/lidRmetrics/reference/metrics_echo2.html</a> |
| n_return_7_above2 | 2 | All returns | Number of returns by each return number        | Long integer | <a href="https://ptompalski.github.io/lidRmetrics/reference/metrics_echo2.html">https://ptompalski.github.io/lidRmetrics/reference/metrics_echo2.html</a> |



|                                 |   |             |                                                         |              |                                                                                                                                                                       |
|---------------------------------|---|-------------|---------------------------------------------------------|--------------|-----------------------------------------------------------------------------------------------------------------------------------------------------------------------|
| n_return_8_above2               | 2 | All returns | Number of returns by each return number                 | Long integer | <a href="https://ptompalski.github.io/lidRmetrics/reference/metrics_echo2.html">https://ptompalski.github.io/lidRmetrics/reference/metrics_echo2.html</a>             |
| n_return_9_above2               | 2 | All returns | Number of returns by each return number                 | Long integer | <a href="https://ptompalski.github.io/lidRmetrics/reference/metrics_echo2.html">https://ptompalski.github.io/lidRmetrics/reference/metrics_echo2.html</a>             |
| n_first_above2                  | 2 | All returns | Number of first returns                                 | Long integer | <a href="https://ptompalski.github.io/lidRmetrics/reference/metrics_echo.html">https://ptompalski.github.io/lidRmetrics/reference/metrics_echo.html</a>               |
| n_intermediate_above2           | 2 | All returns | Number of intermediate returns                          | Long integer | <a href="https://ptompalski.github.io/lidRmetrics/reference/metrics_echo.html">https://ptompalski.github.io/lidRmetrics/reference/metrics_echo.html</a>               |
| n_last_above2                   | 2 | All returns | Number of last returns                                  | Long integer | <a href="https://ptompalski.github.io/lidRmetrics/reference/metrics_echo.html">https://ptompalski.github.io/lidRmetrics/reference/metrics_echo.html</a>               |
| n_single_above2                 | 2 | All returns | Number of single returns                                | Long integer | <a href="https://ptompalski.github.io/lidRmetrics/reference/metrics_echo.html">https://ptompalski.github.io/lidRmetrics/reference/metrics_echo.html</a>               |
| n_multiple_above2               | 2 | All returns | Number of multiple returns                              | Long integer | <a href="https://ptompalski.github.io/lidRmetrics/reference/metrics_echo.html">https://ptompalski.github.io/lidRmetrics/reference/metrics_echo.html</a>               |
| p_first_above2                  | 2 | All returns | Percentage of returns that are first returns (%)        | Float        | <a href="https://ptompalski.github.io/lidRmetrics/reference/metrics_echo.html">https://ptompalski.github.io/lidRmetrics/reference/metrics_echo.html</a>               |
| p_intermediate_above2           | 2 | All returns | Percentage of returns that are intermediate returns (%) | Float        | <a href="https://ptompalski.github.io/lidRmetrics/reference/metrics_echo.html">https://ptompalski.github.io/lidRmetrics/reference/metrics_echo.html</a>               |
| p_last_above2                   | 2 | All returns | Percentage of returns that are last returns (%)         | Float        | <a href="https://ptompalski.github.io/lidRmetrics/reference/metrics_echo.html">https://ptompalski.github.io/lidRmetrics/reference/metrics_echo.html</a>               |
| p_single_above2                 | 2 | All returns | Percentage of returns that are single returns (%)       | Float        | <a href="https://ptompalski.github.io/lidRmetrics/reference/metrics_echo.html">https://ptompalski.github.io/lidRmetrics/reference/metrics_echo.html</a>               |
| p_multiple_above2               | 2 | All returns | Percentage of returns that are multiple returns (%)     | Float        | <a href="https://ptompalski.github.io/lidRmetrics/reference/metrics_echo.html">https://ptompalski.github.io/lidRmetrics/reference/metrics_echo.html</a>               |
| ratio_last_first_above2         | 2 | All returns | Ratio of last returns to first returns                  | Float        | <a href="https://ptompalski.github.io/lidRmetrics/reference/metrics_echo.html">https://ptompalski.github.io/lidRmetrics/reference/metrics_echo.html</a>               |
| ratio_intermediate_first_above2 | 2 | All returns | Ratio of intermediate returns to first returns          | Float        | <a href="https://ptompalski.github.io/lidRmetrics/reference/metrics_echo.html">https://ptompalski.github.io/lidRmetrics/reference/metrics_echo.html</a>               |
| ratio_multiple_single_above2    | 2 | All returns | Ratio of multiple returns to single returns             | Float        | <a href="https://ptompalski.github.io/lidRmetrics/reference/metrics_echo.html">https://ptompalski.github.io/lidRmetrics/reference/metrics_echo.html</a>               |
| zq1_above2                      | 2 | All returns | Height percentile (m)                                   | Float        | <a href="https://ptompalski.github.io/lidRmetrics/reference/metrics_percentiles.html">https://ptompalski.github.io/lidRmetrics/reference/metrics_percentiles.html</a> |
| zq5_above2                      | 2 | All returns | Height percentile (m)                                   | Float        | <a href="https://ptompalski.github.io/lidRmetrics/reference/metrics_percentiles.html">https://ptompalski.github.io/lidRmetrics/reference/metrics_percentiles.html</a> |
| zq10_above2                     | 2 | All returns | Height percentile (m)                                   | Float        | <a href="https://ptompalski.github.io/lidRmetrics/reference/metrics_percentiles.html">https://ptompalski.github.io/lidRmetrics/reference/metrics_percentiles.html</a> |
| zq15_above2                     | 2 | All returns | Height percentile (m)                                   | Float        | <a href="https://ptompalski.github.io/lidRmetrics/reference/metrics_percentiles.html">https://ptompalski.github.io/lidRmetrics/reference/metrics_percentiles.html</a> |
| zq20_above2                     | 2 | All returns | Height percentile (m)                                   | Float        | <a href="https://ptompalski.github.io/lidRmetrics/reference/metrics_percentiles.html">https://ptompalski.github.io/lidRmetrics/reference/metrics_percentiles.html</a> |
| zq25_above2                     | 2 | All returns | Height percentile (m)                                   | Float        | <a href="https://ptompalski.github.io/lidRmetrics/reference/metrics_percentiles.html">https://ptompalski.github.io/lidRmetrics/reference/metrics_percentiles.html</a> |
| zq30_above2                     | 2 | All returns | Height percentile (m)                                   | Float        | <a href="https://ptompalski.github.io/lidRmetrics/reference/metrics_percentiles.html">https://ptompalski.github.io/lidRmetrics/reference/metrics_percentiles.html</a> |

|                   |   |             |                                                                           |       |                                                                                                                                                                           |
|-------------------|---|-------------|---------------------------------------------------------------------------|-------|---------------------------------------------------------------------------------------------------------------------------------------------------------------------------|
| zq35_above2       | 2 | All returns | Height percentile (m)                                                     | Float | <a href="https://ptompalski.github.io/lidRmetrics/reference/metrics_percentiles.html">https://ptompalski.github.io/lidRmetrics/reference/metrics_percentiles.html</a>     |
| zq40_above2       | 2 | All returns | Height percentile (m)                                                     | Float | <a href="https://ptompalski.github.io/lidRmetrics/reference/metrics_percentiles.html">https://ptompalski.github.io/lidRmetrics/reference/metrics_percentiles.html</a>     |
| zq45_above2       | 2 | All returns | Height percentile (m)                                                     | Float | <a href="https://ptompalski.github.io/lidRmetrics/reference/metrics_percentiles.html">https://ptompalski.github.io/lidRmetrics/reference/metrics_percentiles.html</a>     |
| zq50_above2       | 2 | All returns | Height percentile (m)                                                     | Float | <a href="https://ptompalski.github.io/lidRmetrics/reference/metrics_percentiles.html">https://ptompalski.github.io/lidRmetrics/reference/metrics_percentiles.html</a>     |
| zq55_above2       | 2 | All returns | Height percentile (m)                                                     | Float | <a href="https://ptompalski.github.io/lidRmetrics/reference/metrics_percentiles.html">https://ptompalski.github.io/lidRmetrics/reference/metrics_percentiles.html</a>     |
| zq60_above2       | 2 | All returns | Height percentile (m)                                                     | Float | <a href="https://ptompalski.github.io/lidRmetrics/reference/metrics_percentiles.html">https://ptompalski.github.io/lidRmetrics/reference/metrics_percentiles.html</a>     |
| zq65_above2       | 2 | All returns | Height percentile (m)                                                     | Float | <a href="https://ptompalski.github.io/lidRmetrics/reference/metrics_percentiles.html">https://ptompalski.github.io/lidRmetrics/reference/metrics_percentiles.html</a>     |
| zq70_above2       | 2 | All returns | Height percentile (m)                                                     | Float | <a href="https://ptompalski.github.io/lidRmetrics/reference/metrics_percentiles.html">https://ptompalski.github.io/lidRmetrics/reference/metrics_percentiles.html</a>     |
| zq75_above2       | 2 | All returns | Height percentile (m)                                                     | Float | <a href="https://ptompalski.github.io/lidRmetrics/reference/metrics_percentiles.html">https://ptompalski.github.io/lidRmetrics/reference/metrics_percentiles.html</a>     |
| zq80_above2       | 2 | All returns | Height percentile (m)                                                     | Float | <a href="https://ptompalski.github.io/lidRmetrics/reference/metrics_percentiles.html">https://ptompalski.github.io/lidRmetrics/reference/metrics_percentiles.html</a>     |
| zq85_above2       | 2 | All returns | Height percentile (m)                                                     | Float | <a href="https://ptompalski.github.io/lidRmetrics/reference/metrics_percentiles.html">https://ptompalski.github.io/lidRmetrics/reference/metrics_percentiles.html</a>     |
| zq90_above2       | 2 | All returns | Height percentile (m)                                                     | Float | <a href="https://ptompalski.github.io/lidRmetrics/reference/metrics_percentiles.html">https://ptompalski.github.io/lidRmetrics/reference/metrics_percentiles.html</a>     |
| zq95_above2       | 2 | All returns | Height percentile (m)                                                     | Float | <a href="https://ptompalski.github.io/lidRmetrics/reference/metrics_percentiles.html">https://ptompalski.github.io/lidRmetrics/reference/metrics_percentiles.html</a>     |
| zq99_above2       | 2 | All returns | Height percentile (m)                                                     | Float | <a href="https://ptompalski.github.io/lidRmetrics/reference/metrics_percentiles.html">https://ptompalski.github.io/lidRmetrics/reference/metrics_percentiles.html</a>     |
| ziqr_above2       | 2 | All returns | Interquartile range (m)                                                   | Float | <a href="https://ptompalski.github.io/lidRmetrics/reference/metrics_dispersion.html">https://ptompalski.github.io/lidRmetrics/reference/metrics_dispersion.html</a>       |
| zMADmean_above2   | 2 | All returns | Mean absolute deviation of return heights (m)                             | Float | <a href="https://ptompalski.github.io/lidRmetrics/reference/metrics_dispersion.html">https://ptompalski.github.io/lidRmetrics/reference/metrics_dispersion.html</a>       |
| zMADmedian_above2 | 2 | All returns | Median absolute deviation of return heights (m)                           | Float | <a href="https://ptompalski.github.io/lidRmetrics/reference/metrics_dispersion.html">https://ptompalski.github.io/lidRmetrics/reference/metrics_dispersion.html</a>       |
| CRR_above2        | 2 | All returns | Canopy relief ratio                                                       | Float | <a href="https://ptompalski.github.io/lidRmetrics/reference/metrics_dispersion.html">https://ptompalski.github.io/lidRmetrics/reference/metrics_dispersion.html</a>       |
| zentropy_above2   | 2 | All returns | A normalized Shannon vertical complexity index                            | Float | <a href="https://ptompalski.github.io/lidRmetrics/reference/metrics_dispersion.html">https://ptompalski.github.io/lidRmetrics/reference/metrics_dispersion.html</a>       |
| VCI_above2        | 2 | All returns | Vertical complexity index                                                 | Float | <a href="https://ptompalski.github.io/lidRmetrics/reference/metrics_dispersion.html">https://ptompalski.github.io/lidRmetrics/reference/metrics_dispersion.html</a>       |
| zpcum1_above2     | 2 | All returns | Cumulative proportion of returns found in nine equal height intervals (%) | Float | <a href="https://ptompalski.github.io/lidRmetrics/reference/metrics_canopydensity.html">https://ptompalski.github.io/lidRmetrics/reference/metrics_canopydensity.html</a> |
| zpcum2_above2     | 2 | All returns | Cumulative proportion of returns found in nine equal height intervals (%) | Float | <a href="https://ptompalski.github.io/lidRmetrics/reference/metrics_canopydensity.html">https://ptompalski.github.io/lidRmetrics/reference/metrics_canopydensity.html</a> |



|                        |   |             |                                                                           |       |                                                                                                                                                                           |
|------------------------|---|-------------|---------------------------------------------------------------------------|-------|---------------------------------------------------------------------------------------------------------------------------------------------------------------------------|
| zpcum3_above2          | 2 | All returns | Cumulative proportion of returns found in nine equal height intervals (%) | Float | <a href="https://ptompalski.github.io/lidRmetrics/reference/metrics_canopydensity.html">https://ptompalski.github.io/lidRmetrics/reference/metrics_canopydensity.html</a> |
| zpcum4_above2          | 2 | All returns | Cumulative proportion of returns found in nine equal height intervals (%) | Float | <a href="https://ptompalski.github.io/lidRmetrics/reference/metrics_canopydensity.html">https://ptompalski.github.io/lidRmetrics/reference/metrics_canopydensity.html</a> |
| zpcum5_above2          | 2 | All returns | Cumulative proportion of returns found in nine equal height intervals (%) | Float | <a href="https://ptompalski.github.io/lidRmetrics/reference/metrics_canopydensity.html">https://ptompalski.github.io/lidRmetrics/reference/metrics_canopydensity.html</a> |
| zpcum6_above2          | 2 | All returns | Cumulative proportion of returns found in nine equal height intervals (%) | Float | <a href="https://ptompalski.github.io/lidRmetrics/reference/metrics_canopydensity.html">https://ptompalski.github.io/lidRmetrics/reference/metrics_canopydensity.html</a> |
| zpcum7_above2          | 2 | All returns | Cumulative proportion of returns found in nine equal height intervals (%) | Float | <a href="https://ptompalski.github.io/lidRmetrics/reference/metrics_canopydensity.html">https://ptompalski.github.io/lidRmetrics/reference/metrics_canopydensity.html</a> |
| zpcum8_above2          | 2 | All returns | Cumulative proportion of returns found in nine equal height intervals (%) | Float | <a href="https://ptompalski.github.io/lidRmetrics/reference/metrics_canopydensity.html">https://ptompalski.github.io/lidRmetrics/reference/metrics_canopydensity.html</a> |
| zpcum9_above2          | 2 | All returns | Cumulative proportion of returns found in nine equal height intervals (%) | Float | <a href="https://ptompalski.github.io/lidRmetrics/reference/metrics_canopydensity.html">https://ptompalski.github.io/lidRmetrics/reference/metrics_canopydensity.html</a> |
| L1_above2              | 2 | All returns | L-moment, mean                                                            | Float | <a href="https://ptompalski.github.io/lidRmetrics/reference/metrics_Lmoments.html">https://ptompalski.github.io/lidRmetrics/reference/metrics_Lmoments.html</a>           |
| L2_above2              | 2 | All returns | L-moment, variance                                                        | Float | <a href="https://ptompalski.github.io/lidRmetrics/reference/metrics_Lmoments.html">https://ptompalski.github.io/lidRmetrics/reference/metrics_Lmoments.html</a>           |
| L3_above2              | 2 | All returns | L-moment, skewness                                                        | Float | <a href="https://ptompalski.github.io/lidRmetrics/reference/metrics_Lmoments.html">https://ptompalski.github.io/lidRmetrics/reference/metrics_Lmoments.html</a>           |
| L4_above2              | 2 | All returns | L-moment, kurtosis                                                        | Float | <a href="https://ptompalski.github.io/lidRmetrics/reference/metrics_Lmoments.html">https://ptompalski.github.io/lidRmetrics/reference/metrics_Lmoments.html</a>           |
| Lskew_above2           | 2 | All returns | L-moment ratio, skewness                                                  | Float | <a href="https://ptompalski.github.io/lidRmetrics/reference/metrics_Lmoments.html">https://ptompalski.github.io/lidRmetrics/reference/metrics_Lmoments.html</a>           |
| Lkurt_above2           | 2 | All returns | L-moment ratio, kurtosis                                                  | Float | <a href="https://ptompalski.github.io/lidRmetrics/reference/metrics_Lmoments.html">https://ptompalski.github.io/lidRmetrics/reference/metrics_Lmoments.html</a>           |
| Lcoefvar_above2        | 2 | All returns | L-moment ratio, coefficient of variation                                  | Float | <a href="https://ptompalski.github.io/lidRmetrics/reference/metrics_Lmoments.html">https://ptompalski.github.io/lidRmetrics/reference/metrics_Lmoments.html</a>           |
| lad_min_above2         | 2 | All returns | Leaf area density, minimum                                                | Float | <a href="https://ptompalski.github.io/lidRmetrics/reference/metrics_lad.html">https://ptompalski.github.io/lidRmetrics/reference/metrics_lad.html</a>                     |
| lad_max_above2         | 2 | All returns | Leaf area density, maximum                                                | Float | <a href="https://ptompalski.github.io/lidRmetrics/reference/metrics_lad.html">https://ptompalski.github.io/lidRmetrics/reference/metrics_lad.html</a>                     |
| lad_mean_above2        | 2 | All returns | Leaf area density, mean                                                   | Float | <a href="https://ptompalski.github.io/lidRmetrics/reference/metrics_lad.html">https://ptompalski.github.io/lidRmetrics/reference/metrics_lad.html</a>                     |
| lad_cv_above2          | 2 | All returns | Leaf area density, coefficient of variation                               | Float | <a href="https://ptompalski.github.io/lidRmetrics/reference/metrics_lad.html">https://ptompalski.github.io/lidRmetrics/reference/metrics_lad.html</a>                     |
| lad_sum_above2         | 2 | All returns | Leaf area density, sum                                                    | Float | <a href="https://ptompalski.github.io/lidRmetrics/reference/metrics_lad.html">https://ptompalski.github.io/lidRmetrics/reference/metrics_lad.html</a>                     |
| rumple_above2          | 2 | All returns | Ratio of 3D canopy surface area to 2D terrain surface area                | Float | <a href="https://ptompalski.github.io/lidRmetrics/reference/metrics_rumple.html">https://ptompalski.github.io/lidRmetrics/reference/metrics_rumple.html</a>               |
| kde_peaks_count_above2 | 2 | All returns | Kernel density estimation metric                                          | Float | <a href="https://ptompalski.github.io/lidRmetrics/reference/metrics_kde.html">https://ptompalski.github.io/lidRmetrics/reference/metrics_kde.html</a>                     |
| kde_peak1_elev_above2  | 2 | All returns | Kernel density estimation metric                                          | Float | <a href="https://ptompalski.github.io/lidRmetrics/reference/metrics_kde.html">https://ptompalski.github.io/lidRmetrics/reference/metrics_kde.html</a>                     |

|                       |   |               |                                                 |       |                                                                                                                                                                       |
|-----------------------|---|---------------|-------------------------------------------------|-------|-----------------------------------------------------------------------------------------------------------------------------------------------------------------------|
| kde_peak2_elev_bove2  | 2 | All returns   | Kernel density estimation metric                | Float | <a href="https://ptompalski.github.io/lidRmetrics/reference/metrics_kde.html">https://ptompalski.github.io/lidRmetrics/reference/metrics_kde.html</a>                 |
| kde_peak3_elev_bove2  | 2 | All returns   | Kernel density estimation metric                | Float | <a href="https://ptompalski.github.io/lidRmetrics/reference/metrics_kde.html">https://ptompalski.github.io/lidRmetrics/reference/metrics_kde.html</a>                 |
| kde_peak4_elev_bove2  | 2 | All returns   | Kernel density estimation metric                | Float | <a href="https://ptompalski.github.io/lidRmetrics/reference/metrics_kde.html">https://ptompalski.github.io/lidRmetrics/reference/metrics_kde.html</a>                 |
| kde_peak1_value_bove2 | 2 | All returns   | Kernel density estimation metric                | Float | <a href="https://ptompalski.github.io/lidRmetrics/reference/metrics_kde.html">https://ptompalski.github.io/lidRmetrics/reference/metrics_kde.html</a>                 |
| kde_peak2_value_bove2 | 2 | All returns   | Kernel density estimation metric                | Float | <a href="https://ptompalski.github.io/lidRmetrics/reference/metrics_kde.html">https://ptompalski.github.io/lidRmetrics/reference/metrics_kde.html</a>                 |
| kde_peak3_value_bove2 | 2 | All returns   | Kernel density estimation metric                | Float | <a href="https://ptompalski.github.io/lidRmetrics/reference/metrics_kde.html">https://ptompalski.github.io/lidRmetrics/reference/metrics_kde.html</a>                 |
| kde_peak4_value_bove2 | 2 | All returns   | Kernel density estimation metric                | Float | <a href="https://ptompalski.github.io/lidRmetrics/reference/metrics_kde.html">https://ptompalski.github.io/lidRmetrics/reference/metrics_kde.html</a>                 |
| kde_peak1_diff_bove2  | 2 | All returns   | Kernel density estimation metric                | Float | <a href="https://ptompalski.github.io/lidRmetrics/reference/metrics_kde.html">https://ptompalski.github.io/lidRmetrics/reference/metrics_kde.html</a>                 |
| kde_peak2_diff_bove2  | 2 | All returns   | Kernel density estimation metric                | Float | <a href="https://ptompalski.github.io/lidRmetrics/reference/metrics_kde.html">https://ptompalski.github.io/lidRmetrics/reference/metrics_kde.html</a>                 |
| kde_peak3_diff_bove2  | 2 | All returns   | Kernel density estimation metric                | Float | <a href="https://ptompalski.github.io/lidRmetrics/reference/metrics_kde.html">https://ptompalski.github.io/lidRmetrics/reference/metrics_kde.html</a>                 |
| zmax_first            | 0 | First returns | Maximum return height (m)                       | Float | <a href="https://ptompalski.github.io/lidRmetrics/reference/metrics_basic.html">https://ptompalski.github.io/lidRmetrics/reference/metrics_basic.html</a>             |
| zmin_first            | 0 | First returns | Minimum return height (m)                       | Float | <a href="https://ptompalski.github.io/lidRmetrics/reference/metrics_basic.html">https://ptompalski.github.io/lidRmetrics/reference/metrics_basic.html</a>             |
| zmean_first           | 0 | First returns | Mean of return heights (m)                      | Float | <a href="https://ptompalski.github.io/lidRmetrics/reference/metrics_basic.html">https://ptompalski.github.io/lidRmetrics/reference/metrics_basic.html</a>             |
| zvar_first            | 0 | First returns | Variance of return heights (m)                  | Float | <a href="https://ptompalski.github.io/lidRmetrics/reference/metrics_basic.html">https://ptompalski.github.io/lidRmetrics/reference/metrics_basic.html</a>             |
| zsd_first             | 0 | First returns | Standard deviation of return heights (m)        | Float | <a href="https://ptompalski.github.io/lidRmetrics/reference/metrics_basic.html">https://ptompalski.github.io/lidRmetrics/reference/metrics_basic.html</a>             |
| zcv_first             | 0 | First returns | Coefficeient of variation of return heights (%) | Float | <a href="https://ptompalski.github.io/lidRmetrics/reference/metrics_basic.html">https://ptompalski.github.io/lidRmetrics/reference/metrics_basic.html</a>             |
| zskew_first           | 0 | First returns | Skewness of return heights                      | Float | <a href="https://ptompalski.github.io/lidRmetrics/reference/metrics_basic.html">https://ptompalski.github.io/lidRmetrics/reference/metrics_basic.html</a>             |
| zkurt_first           | 0 | First returns | Kurtosis of return heights                      | Float | <a href="https://ptompalski.github.io/lidRmetrics/reference/metrics_basic.html">https://ptompalski.github.io/lidRmetrics/reference/metrics_basic.html</a>             |
| zq1_first             | 0 | First returns | Height percentile (m)                           | Float | <a href="https://ptompalski.github.io/lidRmetrics/reference/metrics_percentiles.html">https://ptompalski.github.io/lidRmetrics/reference/metrics_percentiles.html</a> |
| zq5_first             | 0 | First returns | Height percentile (m)                           | Float | <a href="https://ptompalski.github.io/lidRmetrics/reference/metrics_percentiles.html">https://ptompalski.github.io/lidRmetrics/reference/metrics_percentiles.html</a> |
| zq10_first            | 0 | First returns | Height percentile (m)                           | Float | <a href="https://ptompalski.github.io/lidRmetrics/reference/metrics_percentiles.html">https://ptompalski.github.io/lidRmetrics/reference/metrics_percentiles.html</a> |
| zq15_first            | 0 | First returns | Height percentile (m)                           | Float | <a href="https://ptompalski.github.io/lidRmetrics/reference/metrics_percentiles.html">https://ptompalski.github.io/lidRmetrics/reference/metrics_percentiles.html</a> |

|                   |   |               |                                                    |       |                                                                                                                                                                       |
|-------------------|---|---------------|----------------------------------------------------|-------|-----------------------------------------------------------------------------------------------------------------------------------------------------------------------|
| zq20_first        | 0 | First returns | Height percentile (m)                              | Float | <a href="https://ptompalski.github.io/lidRmetrics/reference/metrics_percentiles.html">https://ptompalski.github.io/lidRmetrics/reference/metrics_percentiles.html</a> |
| zq25_first        | 0 | First returns | Height percentile (m)                              | Float | <a href="https://ptompalski.github.io/lidRmetrics/reference/metrics_percentiles.html">https://ptompalski.github.io/lidRmetrics/reference/metrics_percentiles.html</a> |
| zq30_first        | 0 | First returns | Height percentile (m)                              | Float | <a href="https://ptompalski.github.io/lidRmetrics/reference/metrics_percentiles.html">https://ptompalski.github.io/lidRmetrics/reference/metrics_percentiles.html</a> |
| zq35_first        | 0 | First returns | Height percentile (m)                              | Float | <a href="https://ptompalski.github.io/lidRmetrics/reference/metrics_percentiles.html">https://ptompalski.github.io/lidRmetrics/reference/metrics_percentiles.html</a> |
| zq40_first        | 0 | First returns | Height percentile (m)                              | Float | <a href="https://ptompalski.github.io/lidRmetrics/reference/metrics_percentiles.html">https://ptompalski.github.io/lidRmetrics/reference/metrics_percentiles.html</a> |
| zq45_first        | 0 | First returns | Height percentile (m)                              | Float | <a href="https://ptompalski.github.io/lidRmetrics/reference/metrics_percentiles.html">https://ptompalski.github.io/lidRmetrics/reference/metrics_percentiles.html</a> |
| zq50_first        | 0 | First returns | Height percentile (m)                              | Float | <a href="https://ptompalski.github.io/lidRmetrics/reference/metrics_percentiles.html">https://ptompalski.github.io/lidRmetrics/reference/metrics_percentiles.html</a> |
| zq55_first        | 0 | First returns | Height percentile (m)                              | Float | <a href="https://ptompalski.github.io/lidRmetrics/reference/metrics_percentiles.html">https://ptompalski.github.io/lidRmetrics/reference/metrics_percentiles.html</a> |
| zq60_first        | 0 | First returns | Height percentile (m)                              | Float | <a href="https://ptompalski.github.io/lidRmetrics/reference/metrics_percentiles.html">https://ptompalski.github.io/lidRmetrics/reference/metrics_percentiles.html</a> |
| zq65_first        | 0 | First returns | Height percentile (m)                              | Float | <a href="https://ptompalski.github.io/lidRmetrics/reference/metrics_percentiles.html">https://ptompalski.github.io/lidRmetrics/reference/metrics_percentiles.html</a> |
| zq70_first        | 0 | First returns | Height percentile (m)                              | Float | <a href="https://ptompalski.github.io/lidRmetrics/reference/metrics_percentiles.html">https://ptompalski.github.io/lidRmetrics/reference/metrics_percentiles.html</a> |
| zq75_first        | 0 | First returns | Height percentile (m)                              | Float | <a href="https://ptompalski.github.io/lidRmetrics/reference/metrics_percentiles.html">https://ptompalski.github.io/lidRmetrics/reference/metrics_percentiles.html</a> |
| zq80_first        | 0 | First returns | Height percentile (m)                              | Float | <a href="https://ptompalski.github.io/lidRmetrics/reference/metrics_percentiles.html">https://ptompalski.github.io/lidRmetrics/reference/metrics_percentiles.html</a> |
| zq85_first        | 0 | First returns | Height percentile (m)                              | Float | <a href="https://ptompalski.github.io/lidRmetrics/reference/metrics_percentiles.html">https://ptompalski.github.io/lidRmetrics/reference/metrics_percentiles.html</a> |
| zq90_first        | 0 | First returns | Height percentile (m)                              | Float | <a href="https://ptompalski.github.io/lidRmetrics/reference/metrics_percentiles.html">https://ptompalski.github.io/lidRmetrics/reference/metrics_percentiles.html</a> |
| zq95_first        | 0 | First returns | Height percentile (m)                              | Float | <a href="https://ptompalski.github.io/lidRmetrics/reference/metrics_percentiles.html">https://ptompalski.github.io/lidRmetrics/reference/metrics_percentiles.html</a> |
| zq99_first        | 0 | First returns | Height percentile (m)                              | Float | <a href="https://ptompalski.github.io/lidRmetrics/reference/metrics_percentiles.html">https://ptompalski.github.io/lidRmetrics/reference/metrics_percentiles.html</a> |
| pzabovemean_first | 0 | First returns | Percentage of returns above mean return height (%) | Float | <a href="https://ptompalski.github.io/lidRmetrics/reference/metrics_percabove.html">https://ptompalski.github.io/lidRmetrics/reference/metrics_percabove.html</a>     |
| pzabove2_first    | 0 | First returns | Percentage of returns above 2 m (%)                | Float | <a href="https://ptompalski.github.io/lidRmetrics/reference/metrics_percabove.html">https://ptompalski.github.io/lidRmetrics/reference/metrics_percabove.html</a>     |
| pzabove5_first    | 0 | First returns | Percentage of returns above 5 m (%)                | Float | <a href="https://ptompalski.github.io/lidRmetrics/reference/metrics_percabove.html">https://ptompalski.github.io/lidRmetrics/reference/metrics_percabove.html</a>     |
| ziqr_first        | 0 | First returns | Interquartile range (m)                            | Float | <a href="https://ptompalski.github.io/lidRmetrics/reference/metrics_dispersion.html">https://ptompalski.github.io/lidRmetrics/reference/metrics_dispersion.html</a>   |
| zMADmean_first    | 0 | First returns | Mean absolute deviation of return heights (m)      | Float | <a href="https://ptompalski.github.io/lidRmetrics/reference/metrics_dispersion.html">https://ptompalski.github.io/lidRmetrics/reference/metrics_dispersion.html</a>   |

|                  |   |               |                                                                           |       |                                                                                                                                                                           |
|------------------|---|---------------|---------------------------------------------------------------------------|-------|---------------------------------------------------------------------------------------------------------------------------------------------------------------------------|
| zMADmedian_first | 0 | First returns | Median absolute deviation of return heights (m)                           | Float | <a href="https://ptompalski.github.io/lidRmetrics/reference/metrics_dispersion.html">https://ptompalski.github.io/lidRmetrics/reference/metrics_dispersion.html</a>       |
| CRR_first        | 0 | First returns | Canopy relief ratio                                                       | Float | <a href="https://ptompalski.github.io/lidRmetrics/reference/metrics_dispersion.html">https://ptompalski.github.io/lidRmetrics/reference/metrics_dispersion.html</a>       |
| zentropy_first   | 0 | First returns | A normalized Shannon vertical complexity index                            | Float | <a href="https://ptompalski.github.io/lidRmetrics/reference/metrics_dispersion.html">https://ptompalski.github.io/lidRmetrics/reference/metrics_dispersion.html</a>       |
| VCI_first        | 0 | First returns | Vertical complexity index                                                 | Float | <a href="https://ptompalski.github.io/lidRmetrics/reference/metrics_dispersion.html">https://ptompalski.github.io/lidRmetrics/reference/metrics_dispersion.html</a>       |
| zpcum1_first     | 0 | First returns | Cumulative proportion of returns found in nine equal height intervals (%) | Float | <a href="https://ptompalski.github.io/lidRmetrics/reference/metrics_canopydensity.html">https://ptompalski.github.io/lidRmetrics/reference/metrics_canopydensity.html</a> |
| zpcum2_first     | 0 | First returns | Cumulative proportion of returns found in nine equal height intervals (%) | Float | <a href="https://ptompalski.github.io/lidRmetrics/reference/metrics_canopydensity.html">https://ptompalski.github.io/lidRmetrics/reference/metrics_canopydensity.html</a> |
| zpcum3_first     | 0 | First returns | Cumulative proportion of returns found in nine equal height intervals (%) | Float | <a href="https://ptompalski.github.io/lidRmetrics/reference/metrics_canopydensity.html">https://ptompalski.github.io/lidRmetrics/reference/metrics_canopydensity.html</a> |
| zpcum4_first     | 0 | First returns | Cumulative proportion of returns found in nine equal height intervals (%) | Float | <a href="https://ptompalski.github.io/lidRmetrics/reference/metrics_canopydensity.html">https://ptompalski.github.io/lidRmetrics/reference/metrics_canopydensity.html</a> |
| zpcum5_first     | 0 | First returns | Cumulative proportion of returns found in nine equal height intervals (%) | Float | <a href="https://ptompalski.github.io/lidRmetrics/reference/metrics_canopydensity.html">https://ptompalski.github.io/lidRmetrics/reference/metrics_canopydensity.html</a> |
| zpcum6_first     | 0 | First returns | Cumulative proportion of returns found in nine equal height intervals (%) | Float | <a href="https://ptompalski.github.io/lidRmetrics/reference/metrics_canopydensity.html">https://ptompalski.github.io/lidRmetrics/reference/metrics_canopydensity.html</a> |
| zpcum7_first     | 0 | First returns | Cumulative proportion of returns found in nine equal height intervals (%) | Float | <a href="https://ptompalski.github.io/lidRmetrics/reference/metrics_canopydensity.html">https://ptompalski.github.io/lidRmetrics/reference/metrics_canopydensity.html</a> |
| zpcum8_first     | 0 | First returns | Cumulative proportion of returns found in nine equal height intervals (%) | Float | <a href="https://ptompalski.github.io/lidRmetrics/reference/metrics_canopydensity.html">https://ptompalski.github.io/lidRmetrics/reference/metrics_canopydensity.html</a> |
| zpcum9_first     | 0 | First returns | Cumulative proportion of returns found in nine equal height intervals (%) | Float | <a href="https://ptompalski.github.io/lidRmetrics/reference/metrics_canopydensity.html">https://ptompalski.github.io/lidRmetrics/reference/metrics_canopydensity.html</a> |
| L1_first         | 0 | First returns | L-moment, mean                                                            | Float | <a href="https://ptompalski.github.io/lidRmetrics/reference/metrics_Lmoments.html">https://ptompalski.github.io/lidRmetrics/reference/metrics_Lmoments.html</a>           |
| L2_first         | 0 | First returns | L-moment, variance                                                        | Float | <a href="https://ptompalski.github.io/lidRmetrics/reference/metrics_Lmoments.html">https://ptompalski.github.io/lidRmetrics/reference/metrics_Lmoments.html</a>           |
| L3_first         | 0 | First returns | L-moment, skewness                                                        | Float | <a href="https://ptompalski.github.io/lidRmetrics/reference/metrics_Lmoments.html">https://ptompalski.github.io/lidRmetrics/reference/metrics_Lmoments.html</a>           |
| L4_first         | 0 | First returns | L-moment, kurtosis                                                        | Float | <a href="https://ptompalski.github.io/lidRmetrics/reference/metrics_Lmoments.html">https://ptompalski.github.io/lidRmetrics/reference/metrics_Lmoments.html</a>           |
| Lskew_first      | 0 | First returns | L-moment ratio, skewness                                                  | Float | <a href="https://ptompalski.github.io/lidRmetrics/reference/metrics_Lmoments.html">https://ptompalski.github.io/lidRmetrics/reference/metrics_Lmoments.html</a>           |
| Lkurt_first      | 0 | First returns | L-moment ratio, kurtosis                                                  | Float | <a href="https://ptompalski.github.io/lidRmetrics/reference/metrics_Lmoments.html">https://ptompalski.github.io/lidRmetrics/reference/metrics_Lmoments.html</a>           |
| Lcoefvar_first   | 0 | First returns | L-moment ratio, coefficient of variation                                  | Float | <a href="https://ptompalski.github.io/lidRmetrics/reference/metrics_Lmoments.html">https://ptompalski.github.io/lidRmetrics/reference/metrics_Lmoments.html</a>           |
| lad_min_first    | 0 | First returns | Leaf area density, minimum                                                | Float | <a href="https://ptompalski.github.io/lidRmetrics/reference/metrics_lad.html">https://ptompalski.github.io/lidRmetrics/reference/metrics_lad.html</a>                     |
| lad_max_first    | 0 | First returns | Leaf area density, maximum                                                | Float | <a href="https://ptompalski.github.io/lidRmetrics/reference/metrics_lad.html">https://ptompalski.github.io/lidRmetrics/reference/metrics_lad.html</a>                     |

|                  |   |               |                                                                                         |       |                                                                                                                                                                 |
|------------------|---|---------------|-----------------------------------------------------------------------------------------|-------|-----------------------------------------------------------------------------------------------------------------------------------------------------------------|
| lad_mean_first   | 0 | First returns | Leaf area density, mean                                                                 | Float | <a href="https://ptompalski.github.io/lidRmetrics/reference/metrics_lad.html">https://ptompalski.github.io/lidRmetrics/reference/metrics_lad.html</a>           |
| lad_cv_first     | 0 | First returns | Leaf area density, coefficient of variation                                             | Float | <a href="https://ptompalski.github.io/lidRmetrics/reference/metrics_lad.html">https://ptompalski.github.io/lidRmetrics/reference/metrics_lad.html</a>           |
| lad_sum_first    | 0 | First returns | Leaf area density, sum                                                                  | Float | <a href="https://ptompalski.github.io/lidRmetrics/reference/metrics_lad.html">https://ptompalski.github.io/lidRmetrics/reference/metrics_lad.html</a>           |
| pz_below_0_first | 0 | First returns | Percentage of points calculated for a set of horizontal layers ( $\leq 0$ ) (%)         | Float | <a href="https://ptompalski.github.io/lidRmetrics/reference/metrics_interval.html">https://ptompalski.github.io/lidRmetrics/reference/metrics_interval.html</a> |
| pz_0_1_first     | 0 | First returns | Percentage of points calculated for a set of horizontal layers ( $> 0$ & $\leq 1$ ) (%) | Float | <a href="https://ptompalski.github.io/lidRmetrics/reference/metrics_interval.html">https://ptompalski.github.io/lidRmetrics/reference/metrics_interval.html</a> |
| pz_1_2_first     | 0 | First returns | Percentage of points calculated for a set of horizontal layers (%)                      | Float | <a href="https://ptompalski.github.io/lidRmetrics/reference/metrics_interval.html">https://ptompalski.github.io/lidRmetrics/reference/metrics_interval.html</a> |
| pz_2_3_first     | 0 | First returns | Percentage of points calculated for a set of horizontal layers (%)                      | Float | <a href="https://ptompalski.github.io/lidRmetrics/reference/metrics_interval.html">https://ptompalski.github.io/lidRmetrics/reference/metrics_interval.html</a> |
| pz_3_4_first     | 0 | First returns | Percentage of points calculated for a set of horizontal layers (%)                      | Float | <a href="https://ptompalski.github.io/lidRmetrics/reference/metrics_interval.html">https://ptompalski.github.io/lidRmetrics/reference/metrics_interval.html</a> |
| pz_4_5_first     | 0 | First returns | Percentage of points calculated for a set of horizontal layers (%)                      | Float | <a href="https://ptompalski.github.io/lidRmetrics/reference/metrics_interval.html">https://ptompalski.github.io/lidRmetrics/reference/metrics_interval.html</a> |
| pz_5_6_first     | 0 | First returns | Percentage of points calculated for a set of horizontal layers (%)                      | Float | <a href="https://ptompalski.github.io/lidRmetrics/reference/metrics_interval.html">https://ptompalski.github.io/lidRmetrics/reference/metrics_interval.html</a> |
| pz_6_7_first     | 0 | First returns | Percentage of points calculated for a set of horizontal layers (%)                      | Float | <a href="https://ptompalski.github.io/lidRmetrics/reference/metrics_interval.html">https://ptompalski.github.io/lidRmetrics/reference/metrics_interval.html</a> |
| pz_7_8_first     | 0 | First returns | Percentage of points calculated for a set of horizontal layers (%)                      | Float | <a href="https://ptompalski.github.io/lidRmetrics/reference/metrics_interval.html">https://ptompalski.github.io/lidRmetrics/reference/metrics_interval.html</a> |
| pz_8_9_first     | 0 | First returns | Percentage of points calculated for a set of horizontal layers (%)                      | Float | <a href="https://ptompalski.github.io/lidRmetrics/reference/metrics_interval.html">https://ptompalski.github.io/lidRmetrics/reference/metrics_interval.html</a> |
| pz_9_10_first    | 0 | First returns | Percentage of points calculated for a set of horizontal layers (%)                      | Float | <a href="https://ptompalski.github.io/lidRmetrics/reference/metrics_interval.html">https://ptompalski.github.io/lidRmetrics/reference/metrics_interval.html</a> |
| pz_10_15_first   | 0 | First returns | Percentage of points calculated for a set of horizontal layers (%)                      | Float | <a href="https://ptompalski.github.io/lidRmetrics/reference/metrics_interval.html">https://ptompalski.github.io/lidRmetrics/reference/metrics_interval.html</a> |
| pz_15_20_first   | 0 | First returns | Percentage of points calculated for a set of horizontal layers (%)                      | Float | <a href="https://ptompalski.github.io/lidRmetrics/reference/metrics_interval.html">https://ptompalski.github.io/lidRmetrics/reference/metrics_interval.html</a> |
| pz_20_25_first   | 0 | First returns | Percentage of points calculated for a set of horizontal layers (%)                      | Float | <a href="https://ptompalski.github.io/lidRmetrics/reference/metrics_interval.html">https://ptompalski.github.io/lidRmetrics/reference/metrics_interval.html</a> |
| pz_25_30_first   | 0 | First returns | Percentage of points calculated for a set of horizontal layers (%)                      | Float | <a href="https://ptompalski.github.io/lidRmetrics/reference/metrics_interval.html">https://ptompalski.github.io/lidRmetrics/reference/metrics_interval.html</a> |
| pz_30_35_first   | 0 | First returns | Percentage of points calculated for a set of horizontal layers (%)                      | Float | <a href="https://ptompalski.github.io/lidRmetrics/reference/metrics_interval.html">https://ptompalski.github.io/lidRmetrics/reference/metrics_interval.html</a> |
| pz_35_40_first   | 0 | First returns | Percentage of points calculated for a set of horizontal layers (%)                      | Float | <a href="https://ptompalski.github.io/lidRmetrics/reference/metrics_interval.html">https://ptompalski.github.io/lidRmetrics/reference/metrics_interval.html</a> |
| pz_40_45_first   | 0 | First returns | Percentage of points calculated for a set of horizontal layers (%)                      | Float | <a href="https://ptompalski.github.io/lidRmetrics/reference/metrics_interval.html">https://ptompalski.github.io/lidRmetrics/reference/metrics_interval.html</a> |
| pz_45_50_first   | 0 | First returns | Percentage of points calculated for a set of horizontal layers (%)                      | Float | <a href="https://ptompalski.github.io/lidRmetrics/reference/metrics_interval.html">https://ptompalski.github.io/lidRmetrics/reference/metrics_interval.html</a> |

|                       |   |               |                                                                    |              |                                                                                                                                                                 |
|-----------------------|---|---------------|--------------------------------------------------------------------|--------------|-----------------------------------------------------------------------------------------------------------------------------------------------------------------|
| pz_above_50_first     | 0 | First returns | Percentage of points calculated for a set of horizontal layers (%) | Float        | <a href="https://ptompalski.github.io/lidRmetrics/reference/metrics_interval.html">https://ptompalski.github.io/lidRmetrics/reference/metrics_interval.html</a> |
| rumple_first          | 0 | First returns | Ratio of 3D canopy surface area to 2D terrain surface area         | Float        | <a href="https://ptompalski.github.io/lidRmetrics/reference/metrics_rumple.html">https://ptompalski.github.io/lidRmetrics/reference/metrics_rumple.html</a>     |
| kde_peaks_count_first | 0 | First returns | Kernel density estimation metric                                   | Float        | <a href="https://ptompalski.github.io/lidRmetrics/reference/metrics_kde.html">https://ptompalski.github.io/lidRmetrics/reference/metrics_kde.html</a>           |
| kde_peak1_elev_first  | 0 | First returns | Kernel density estimation metric                                   | Float        | <a href="https://ptompalski.github.io/lidRmetrics/reference/metrics_kde.html">https://ptompalski.github.io/lidRmetrics/reference/metrics_kde.html</a>           |
| kde_peak2_elev_first  | 0 | First returns | Kernel density estimation metric                                   | Float        | <a href="https://ptompalski.github.io/lidRmetrics/reference/metrics_kde.html">https://ptompalski.github.io/lidRmetrics/reference/metrics_kde.html</a>           |
| kde_peak3_elev_first  | 0 | First returns | Kernel density estimation metric                                   | Float        | <a href="https://ptompalski.github.io/lidRmetrics/reference/metrics_kde.html">https://ptompalski.github.io/lidRmetrics/reference/metrics_kde.html</a>           |
| kde_peak4_elev_first  | 0 | First returns | Kernel density estimation metric                                   | Float        | <a href="https://ptompalski.github.io/lidRmetrics/reference/metrics_kde.html">https://ptompalski.github.io/lidRmetrics/reference/metrics_kde.html</a>           |
| kde_peak1_value_first | 0 | First returns | Kernel density estimation metric                                   | Float        | <a href="https://ptompalski.github.io/lidRmetrics/reference/metrics_kde.html">https://ptompalski.github.io/lidRmetrics/reference/metrics_kde.html</a>           |
| kde_peak2_value_first | 0 | First returns | Kernel density estimation metric                                   | Float        | <a href="https://ptompalski.github.io/lidRmetrics/reference/metrics_kde.html">https://ptompalski.github.io/lidRmetrics/reference/metrics_kde.html</a>           |
| kde_peak3_value_first | 0 | First returns | Kernel density estimation metric                                   | Float        | <a href="https://ptompalski.github.io/lidRmetrics/reference/metrics_kde.html">https://ptompalski.github.io/lidRmetrics/reference/metrics_kde.html</a>           |
| kde_peak4_value_first | 0 | First returns | Kernel density estimation metric                                   | Float        | <a href="https://ptompalski.github.io/lidRmetrics/reference/metrics_kde.html">https://ptompalski.github.io/lidRmetrics/reference/metrics_kde.html</a>           |
| kde_peak1_diff_first  | 0 | First returns | Kernel density estimation metric                                   | Float        | <a href="https://ptompalski.github.io/lidRmetrics/reference/metrics_kde.html">https://ptompalski.github.io/lidRmetrics/reference/metrics_kde.html</a>           |
| kde_peak2_diff_first  | 0 | First returns | Kernel density estimation metric                                   | Float        | <a href="https://ptompalski.github.io/lidRmetrics/reference/metrics_kde.html">https://ptompalski.github.io/lidRmetrics/reference/metrics_kde.html</a>           |
| kde_peak3_diff_first  | 0 | First returns | Kernel density estimation metric                                   | Float        | <a href="https://ptompalski.github.io/lidRmetrics/reference/metrics_kde.html">https://ptompalski.github.io/lidRmetrics/reference/metrics_kde.html</a>           |
| n_above2_first        | 2 | First returns | Number of returns                                                  | Long integer | <a href="https://ptompalski.github.io/lidRmetrics/reference/metrics_basic.html">https://ptompalski.github.io/lidRmetrics/reference/metrics_basic.html</a>       |
| zmax_above2_first     | 2 | First returns | Maximum return height (m)                                          | Float        | <a href="https://ptompalski.github.io/lidRmetrics/reference/metrics_basic.html">https://ptompalski.github.io/lidRmetrics/reference/metrics_basic.html</a>       |
| zmin_above2_first     | 2 | First returns | Minimum return height (m)                                          | Float        | <a href="https://ptompalski.github.io/lidRmetrics/reference/metrics_basic.html">https://ptompalski.github.io/lidRmetrics/reference/metrics_basic.html</a>       |
| zmean_above2_first    | 2 | First returns | Mean of return heights (m)                                         | Float        | <a href="https://ptompalski.github.io/lidRmetrics/reference/metrics_basic.html">https://ptompalski.github.io/lidRmetrics/reference/metrics_basic.html</a>       |
| zvar_above2_first     | 2 | First returns | Variance of return heights (m)                                     | Float        | <a href="https://ptompalski.github.io/lidRmetrics/reference/metrics_basic.html">https://ptompalski.github.io/lidRmetrics/reference/metrics_basic.html</a>       |
| zsd_above2_first      | 2 | First returns | Standard deviation of return heights (m)                           | Float        | <a href="https://ptompalski.github.io/lidRmetrics/reference/metrics_basic.html">https://ptompalski.github.io/lidRmetrics/reference/metrics_basic.html</a>       |
| zcv_above2_first      | 2 | First returns | Coefficeint of variation of return heights (%)                     | Float        | <a href="https://ptompalski.github.io/lidRmetrics/reference/metrics_basic.html">https://ptompalski.github.io/lidRmetrics/reference/metrics_basic.html</a>       |
| zskew_above2_first    | 2 | First returns | Skewness of return heights                                         | Float        | <a href="https://ptompalski.github.io/lidRmetrics/reference/metrics_basic.html">https://ptompalski.github.io/lidRmetrics/reference/metrics_basic.html</a>       |



[illegible]

|                         |   |               |                                                                           |       |                                                                                                                                                                           |
|-------------------------|---|---------------|---------------------------------------------------------------------------|-------|---------------------------------------------------------------------------------------------------------------------------------------------------------------------------|
| ziqr_above2_first       | 2 | First returns | Interquartile range (m)                                                   | Float | <a href="https://ptompalski.github.io/lidRmetrics/reference/metrics_dispersion.html">https://ptompalski.github.io/lidRmetrics/reference/metrics_dispersion.html</a>       |
| zMADmean_above2_first   | 2 | First returns | Mean absolute deviation of return heights (m)                             | Float | <a href="https://ptompalski.github.io/lidRmetrics/reference/metrics_dispersion.html">https://ptompalski.github.io/lidRmetrics/reference/metrics_dispersion.html</a>       |
| zMADmedian_above2_first | 2 | First returns | Median absolute deviation of return heights (m)                           | Float | <a href="https://ptompalski.github.io/lidRmetrics/reference/metrics_dispersion.html">https://ptompalski.github.io/lidRmetrics/reference/metrics_dispersion.html</a>       |
| CRR_above2_first        | 2 | First returns | Canopy relief ratio                                                       | Float | <a href="https://ptompalski.github.io/lidRmetrics/reference/metrics_dispersion.html">https://ptompalski.github.io/lidRmetrics/reference/metrics_dispersion.html</a>       |
| zentropy_above2_first   | 2 | First returns | A normalized Shannon vertical complexity index                            | Float | <a href="https://ptompalski.github.io/lidRmetrics/reference/metrics_dispersion.html">https://ptompalski.github.io/lidRmetrics/reference/metrics_dispersion.html</a>       |
| VCI_above2_first        | 2 | First returns | Vertical complexity index                                                 | Float | <a href="https://ptompalski.github.io/lidRmetrics/reference/metrics_dispersion.html">https://ptompalski.github.io/lidRmetrics/reference/metrics_dispersion.html</a>       |
| zpcum1_above2_first     | 2 | First returns | Cumulative proportion of returns found in nine equal height intervals (%) | Float | <a href="https://ptompalski.github.io/lidRmetrics/reference/metrics_canopydensity.html">https://ptompalski.github.io/lidRmetrics/reference/metrics_canopydensity.html</a> |
| zpcum2_above2_first     | 2 | First returns | Cumulative proportion of returns found in nine equal height intervals (%) | Float | <a href="https://ptompalski.github.io/lidRmetrics/reference/metrics_canopydensity.html">https://ptompalski.github.io/lidRmetrics/reference/metrics_canopydensity.html</a> |
| zpcum3_above2_first     | 2 | First returns | Cumulative proportion of returns found in nine equal height intervals (%) | Float | <a href="https://ptompalski.github.io/lidRmetrics/reference/metrics_canopydensity.html">https://ptompalski.github.io/lidRmetrics/reference/metrics_canopydensity.html</a> |
| zpcum4_above2_first     | 2 | First returns | Cumulative proportion of returns found in nine equal height intervals (%) | Float | <a href="https://ptompalski.github.io/lidRmetrics/reference/metrics_canopydensity.html">https://ptompalski.github.io/lidRmetrics/reference/metrics_canopydensity.html</a> |
| zpcum5_above2_first     | 2 | First returns | Cumulative proportion of returns found in nine equal height intervals (%) | Float | <a href="https://ptompalski.github.io/lidRmetrics/reference/metrics_canopydensity.html">https://ptompalski.github.io/lidRmetrics/reference/metrics_canopydensity.html</a> |
| zpcum6_above2_first     | 2 | First returns | Cumulative proportion of returns found in nine equal height intervals (%) | Float | <a href="https://ptompalski.github.io/lidRmetrics/reference/metrics_canopydensity.html">https://ptompalski.github.io/lidRmetrics/reference/metrics_canopydensity.html</a> |
| zpcum7_above2_first     | 2 | First returns | Cumulative proportion of returns found in nine equal height intervals (%) | Float | <a href="https://ptompalski.github.io/lidRmetrics/reference/metrics_canopydensity.html">https://ptompalski.github.io/lidRmetrics/reference/metrics_canopydensity.html</a> |
| zpcum8_above2_first     | 2 | First returns | Cumulative proportion of returns found in nine equal height intervals (%) | Float | <a href="https://ptompalski.github.io/lidRmetrics/reference/metrics_canopydensity.html">https://ptompalski.github.io/lidRmetrics/reference/metrics_canopydensity.html</a> |
| zpcum9_above2_first     | 2 | First returns | Cumulative proportion of returns found in nine equal height intervals (%) | Float | <a href="https://ptompalski.github.io/lidRmetrics/reference/metrics_canopydensity.html">https://ptompalski.github.io/lidRmetrics/reference/metrics_canopydensity.html</a> |
| L1_above2_first         | 2 | First returns | L-moment, mean                                                            | Float | <a href="https://ptompalski.github.io/lidRmetrics/reference/metrics_Lmoments.html">https://ptompalski.github.io/lidRmetrics/reference/metrics_Lmoments.html</a>           |
| L2_above2_first         | 2 | First returns | L-moment, variance                                                        | Float | <a href="https://ptompalski.github.io/lidRmetrics/reference/metrics_Lmoments.html">https://ptompalski.github.io/lidRmetrics/reference/metrics_Lmoments.html</a>           |
| L3_above2_first         | 2 | First returns | L-moment, skewness                                                        | Float | <a href="https://ptompalski.github.io/lidRmetrics/reference/metrics_Lmoments.html">https://ptompalski.github.io/lidRmetrics/reference/metrics_Lmoments.html</a>           |
| L4_above2_first         | 2 | First returns | L-moment, kurtosis                                                        | Float | <a href="https://ptompalski.github.io/lidRmetrics/reference/metrics_Lmoments.html">https://ptompalski.github.io/lidRmetrics/reference/metrics_Lmoments.html</a>           |
| Lskew_above2_first      | 2 | First returns | L-moment ratio, skewness                                                  | Float | <a href="https://ptompalski.github.io/lidRmetrics/reference/metrics_Lmoments.html">https://ptompalski.github.io/lidRmetrics/reference/metrics_Lmoments.html</a>           |
| Lkurt_above2_first      | 2 | First returns | L-moment ratio, kurtosis                                                  | Float | <a href="https://ptompalski.github.io/lidRmetrics/reference/metrics_Lmoments.html">https://ptompalski.github.io/lidRmetrics/reference/metrics_Lmoments.html</a>           |
| Lcoefvar_above2_first   | 2 | First returns | L-moment ratio, coefficient of variation                                  | Float | <a href="https://ptompalski.github.io/lidRmetrics/reference/metrics_Lmoments.html">https://ptompalski.github.io/lidRmetrics/reference/metrics_Lmoments.html</a>           |

|                              |   |               |                                                            |       |                                                                                                                                                             |
|------------------------------|---|---------------|------------------------------------------------------------|-------|-------------------------------------------------------------------------------------------------------------------------------------------------------------|
| lad_min_above2_first         | 2 | First returns | Leaf area density, minimum                                 | Float | <a href="https://ptompalski.github.io/lidRmetrics/reference/metrics_lad.html">https://ptompalski.github.io/lidRmetrics/reference/metrics_lad.html</a>       |
| lad_max_above2_first         | 2 | First returns | Leaf area density, maximum                                 | Float | <a href="https://ptompalski.github.io/lidRmetrics/reference/metrics_lad.html">https://ptompalski.github.io/lidRmetrics/reference/metrics_lad.html</a>       |
| lad_mean_above2_first        | 2 | First returns | Leaf area density, mean                                    | Float | <a href="https://ptompalski.github.io/lidRmetrics/reference/metrics_lad.html">https://ptompalski.github.io/lidRmetrics/reference/metrics_lad.html</a>       |
| lad_cv_above2_first          | 2 | First returns | Leaf area density, coefficient of variation                | Float | <a href="https://ptompalski.github.io/lidRmetrics/reference/metrics_lad.html">https://ptompalski.github.io/lidRmetrics/reference/metrics_lad.html</a>       |
| lad_sum_above2_first         | 2 | First returns | Leaf area density, sum                                     | Float | <a href="https://ptompalski.github.io/lidRmetrics/reference/metrics_lad.html">https://ptompalski.github.io/lidRmetrics/reference/metrics_lad.html</a>       |
| rumple_above2_first          | 2 | First returns | Ratio of 3D canopy surface area to 2D terrain surface area | Float | <a href="https://ptompalski.github.io/lidRmetrics/reference/metrics_rumple.html">https://ptompalski.github.io/lidRmetrics/reference/metrics_rumple.html</a> |
| kde_peaks_count_above2_first | 2 | First returns | Kernel density estimation metric                           | Float | <a href="https://ptompalski.github.io/lidRmetrics/reference/metrics_kde.html">https://ptompalski.github.io/lidRmetrics/reference/metrics_kde.html</a>       |
| kde_peak1_elev_above2_first  | 2 | First returns | Kernel density estimation metric                           | Float | <a href="https://ptompalski.github.io/lidRmetrics/reference/metrics_kde.html">https://ptompalski.github.io/lidRmetrics/reference/metrics_kde.html</a>       |
| kde_peak2_elev_above2_first  | 2 | First returns | Kernel density estimation metric                           | Float | <a href="https://ptompalski.github.io/lidRmetrics/reference/metrics_kde.html">https://ptompalski.github.io/lidRmetrics/reference/metrics_kde.html</a>       |
| kde_peak3_elev_above2_first  | 2 | First returns | Kernel density estimation metric                           | Float | <a href="https://ptompalski.github.io/lidRmetrics/reference/metrics_kde.html">https://ptompalski.github.io/lidRmetrics/reference/metrics_kde.html</a>       |
| kde_peak4_elev_above2_first  | 2 | First returns | Kernel density estimation metric                           | Float | <a href="https://ptompalski.github.io/lidRmetrics/reference/metrics_kde.html">https://ptompalski.github.io/lidRmetrics/reference/metrics_kde.html</a>       |
| kde_peak1_value_above2_first | 2 | First returns | Kernel density estimation metric                           | Float | <a href="https://ptompalski.github.io/lidRmetrics/reference/metrics_kde.html">https://ptompalski.github.io/lidRmetrics/reference/metrics_kde.html</a>       |
| kde_peak2_value_above2_first | 2 | First returns | Kernel density estimation metric                           | Float | <a href="https://ptompalski.github.io/lidRmetrics/reference/metrics_kde.html">https://ptompalski.github.io/lidRmetrics/reference/metrics_kde.html</a>       |
| kde_peak3_value_above2_first | 2 | First returns | Kernel density estimation metric                           | Float | <a href="https://ptompalski.github.io/lidRmetrics/reference/metrics_kde.html">https://ptompalski.github.io/lidRmetrics/reference/metrics_kde.html</a>       |
| kde_peak4_value_above2_first | 2 | First returns | Kernel density estimation metric                           | Float | <a href="https://ptompalski.github.io/lidRmetrics/reference/metrics_kde.html">https://ptompalski.github.io/lidRmetrics/reference/metrics_kde.html</a>       |
| kde_peak1_diff_above2_first  | 2 | First returns | Kernel density estimation metric                           | Float | <a href="https://ptompalski.github.io/lidRmetrics/reference/metrics_kde.html">https://ptompalski.github.io/lidRmetrics/reference/metrics_kde.html</a>       |
| kde_peak2_diff_above2_first  | 2 | First returns | Kernel density estimation metric                           | Float | <a href="https://ptompalski.github.io/lidRmetrics/reference/metrics_kde.html">https://ptompalski.github.io/lidRmetrics/reference/metrics_kde.html</a>       |
| kde_peak3_diff_above2_first  | 2 | First returns | Kernel density estimation metric                           | Float | <a href="https://ptompalski.github.io/lidRmetrics/reference/metrics_kde.html">https://ptompalski.github.io/lidRmetrics/reference/metrics_kde.html</a>       |
