# Supplementary material for: Airborne laser scanning transects over Canada's northern forests: lidar plots for science and application
Source: Copernicus journal article supplement (doi:10.5194/essd-2025-520), 2025-10-06
Supplement: Supplementary file 2 [file Supplement_B-selected_point_cloud_metrics.pdf › Supplement_B-selected_point_cloud_metrics.pdf]

| Point cloud metric  | Height threshold (m) | Return type   | Description                                                | Data type | Link                                                                                                                                                                  |
|---------------------|----------------------|---------------|------------------------------------------------------------|-----------|-----------------------------------------------------------------------------------------------------------------------------------------------------------------------|
| zmean_above2_first  | 2                    | First returns | Mean of return heights (m)                                 | Float     | <a href="https://ptompalski.github.io/lidRmetrics/reference/metrics_basic.html">https://ptompalski.github.io/lidRmetrics/reference/metrics_basic.html</a>             |
| zsd_above2_first    | 2                    | First returns | Standard deviation of return heights (m)                   | Float     | <a href="https://ptompalski.github.io/lidRmetrics/reference/metrics_basic.html">https://ptompalski.github.io/lidRmetrics/reference/metrics_basic.html</a>             |
| zcv_above2_first    | 2                    | First returns | Coefficient of variation of return heights (%)             | Float     | <a href="https://ptompalski.github.io/lidRmetrics/reference/metrics_basic.html">https://ptompalski.github.io/lidRmetrics/reference/metrics_basic.html</a>             |
| zq1_above2_first    | 2                    | First returns | Height percentile (m)                                      | Float     | <a href="https://ptompalski.github.io/lidRmetrics/reference/metrics_percentiles.html">https://ptompalski.github.io/lidRmetrics/reference/metrics_percentiles.html</a> |
| zq5_above2_first    | 2                    | First returns | Height percentile (m)                                      | Float     | <a href="https://ptompalski.github.io/lidRmetrics/reference/metrics_percentiles.html">https://ptompalski.github.io/lidRmetrics/reference/metrics_percentiles.html</a> |
| zq10_above2_first   | 2                    | First returns | Height percentile (m)                                      | Float     | <a href="https://ptompalski.github.io/lidRmetrics/reference/metrics_percentiles.html">https://ptompalski.github.io/lidRmetrics/reference/metrics_percentiles.html</a> |
| zq20_above2_first   | 2                    | First returns | Height percentile (m)                                      | Float     | <a href="https://ptompalski.github.io/lidRmetrics/reference/metrics_percentiles.html">https://ptompalski.github.io/lidRmetrics/reference/metrics_percentiles.html</a> |
| zq25_above2_first   | 2                    | First returns | Height percentile (m)                                      | Float     | <a href="https://ptompalski.github.io/lidRmetrics/reference/metrics_percentiles.html">https://ptompalski.github.io/lidRmetrics/reference/metrics_percentiles.html</a> |
| zq30_above2_first   | 2                    | First returns | Height percentile (m)                                      | Float     | <a href="https://ptompalski.github.io/lidRmetrics/reference/metrics_percentiles.html">https://ptompalski.github.io/lidRmetrics/reference/metrics_percentiles.html</a> |
| zq40_above2_first   | 2                    | First returns | Height percentile (m)                                      | Float     | <a href="https://ptompalski.github.io/lidRmetrics/reference/metrics_percentiles.html">https://ptompalski.github.io/lidRmetrics/reference/metrics_percentiles.html</a> |
| zq50_above2_first   | 2                    | First returns | Height percentile (m)                                      | Float     | <a href="https://ptompalski.github.io/lidRmetrics/reference/metrics_percentiles.html">https://ptompalski.github.io/lidRmetrics/reference/metrics_percentiles.html</a> |
| zq60_above2_first   | 2                    | First returns | Height percentile (m)                                      | Float     | <a href="https://ptompalski.github.io/lidRmetrics/reference/metrics_percentiles.html">https://ptompalski.github.io/lidRmetrics/reference/metrics_percentiles.html</a> |
| zq70_above2_first   | 2                    | First returns | Height percentile (m)                                      | Float     | <a href="https://ptompalski.github.io/lidRmetrics/reference/metrics_percentiles.html">https://ptompalski.github.io/lidRmetrics/reference/metrics_percentiles.html</a> |
| zq75_above2_first   | 2                    | First returns | Height percentile (m)                                      | Float     | <a href="https://ptompalski.github.io/lidRmetrics/reference/metrics_percentiles.html">https://ptompalski.github.io/lidRmetrics/reference/metrics_percentiles.html</a> |
| zq80_above2_first   | 2                    | First returns | Height percentile (m)                                      | Float     | <a href="https://ptompalski.github.io/lidRmetrics/reference/metrics_percentiles.html">https://ptompalski.github.io/lidRmetrics/reference/metrics_percentiles.html</a> |
| zq90_above2_first   | 2                    | First returns | Height percentile (m)                                      | Float     | <a href="https://ptompalski.github.io/lidRmetrics/reference/metrics_percentiles.html">https://ptompalski.github.io/lidRmetrics/reference/metrics_percentiles.html</a> |
| zq95_above2_first   | 2                    | First returns | Height percentile (m)                                      | Float     | <a href="https://ptompalski.github.io/lidRmetrics/reference/metrics_percentiles.html">https://ptompalski.github.io/lidRmetrics/reference/metrics_percentiles.html</a> |
| zq99_above2_first   | 2                    | First returns | Height percentile (m)                                      | Float     | <a href="https://ptompalski.github.io/lidRmetrics/reference/metrics_percentiles.html">https://ptompalski.github.io/lidRmetrics/reference/metrics_percentiles.html</a> |
| rumple_above2_first | 2                    | First returns | Ratio of 3D canopy surface area to 2D terrain surface area | Float     | <a href="https://ptompalski.github.io/lidRmetrics/reference/metrics_rumple.html">https://ptompalski.github.io/lidRmetrics/reference/metrics_rumple.html</a>           |
| pzabovemean_first   | 0                    | First returns | Percentage of returns above mean return height (%)         | Float     | <a href="https://ptompalski.github.io/lidRmetrics/reference/metrics_percabove.html">https://ptompalski.github.io/lidRmetrics/reference/metrics_percabove.html</a>     |
| pzabove2_first      | 0                    | First returns | Percentage of returns above 2 m (%)                        | Float     | <a href="https://ptompalski.github.io/lidRmetrics/reference/metrics_percabove.html">https://ptompalski.github.io/lidRmetrics/reference/metrics_percabove.html</a>     |

|             |   |             |                                                                                         |       |                                                                                                                                                                 |
|-------------|---|-------------|-----------------------------------------------------------------------------------------|-------|-----------------------------------------------------------------------------------------------------------------------------------------------------------------|
| pz_0_1      | 0 | All returns | Percentage of points calculated for a set of horizontal layers ( $> 0$ & $\leq 1$ ) (%) | Float | <a href="https://ptompalski.github.io/lidRmetrics/reference/metrics_interval.html">https://ptompalski.github.io/lidRmetrics/reference/metrics_interval.html</a> |
| pz_1_2      | 0 | All returns | Percentage of points calculated for a set of horizontal layers (%)                      | Float | <a href="https://ptompalski.github.io/lidRmetrics/reference/metrics_interval.html">https://ptompalski.github.io/lidRmetrics/reference/metrics_interval.html</a> |
| pz_2_3      | 0 | All returns | Percentage of points calculated for a set of horizontal layers (%)                      | Float | <a href="https://ptompalski.github.io/lidRmetrics/reference/metrics_interval.html">https://ptompalski.github.io/lidRmetrics/reference/metrics_interval.html</a> |
| pz_3_4      | 0 | All returns | Percentage of points calculated for a set of horizontal layers (%)                      | Float | <a href="https://ptompalski.github.io/lidRmetrics/reference/metrics_interval.html">https://ptompalski.github.io/lidRmetrics/reference/metrics_interval.html</a> |
| pz_4_5      | 0 | All returns | Percentage of points calculated for a set of horizontal layers (%)                      | Float | <a href="https://ptompalski.github.io/lidRmetrics/reference/metrics_interval.html">https://ptompalski.github.io/lidRmetrics/reference/metrics_interval.html</a> |
| pz_5_6      | 0 | All returns | Percentage of points calculated for a set of horizontal layers (%)                      | Float | <a href="https://ptompalski.github.io/lidRmetrics/reference/metrics_interval.html">https://ptompalski.github.io/lidRmetrics/reference/metrics_interval.html</a> |
| pz_6_7      | 0 | All returns | Percentage of points calculated for a set of horizontal layers (%)                      | Float | <a href="https://ptompalski.github.io/lidRmetrics/reference/metrics_interval.html">https://ptompalski.github.io/lidRmetrics/reference/metrics_interval.html</a> |
| pz_7_8      | 0 | All returns | Percentage of points calculated for a set of horizontal layers (%)                      | Float | <a href="https://ptompalski.github.io/lidRmetrics/reference/metrics_interval.html">https://ptompalski.github.io/lidRmetrics/reference/metrics_interval.html</a> |
| pz_8_9      | 0 | All returns | Percentage of points calculated for a set of horizontal layers (%)                      | Float | <a href="https://ptompalski.github.io/lidRmetrics/reference/metrics_interval.html">https://ptompalski.github.io/lidRmetrics/reference/metrics_interval.html</a> |
| pz_9_10     | 0 | All returns | Percentage of points calculated for a set of horizontal layers (%)                      | Float | <a href="https://ptompalski.github.io/lidRmetrics/reference/metrics_interval.html">https://ptompalski.github.io/lidRmetrics/reference/metrics_interval.html</a> |
| pz_10_15    | 0 | All returns | Percentage of points calculated for a set of horizontal layers (%)                      | Float | <a href="https://ptompalski.github.io/lidRmetrics/reference/metrics_interval.html">https://ptompalski.github.io/lidRmetrics/reference/metrics_interval.html</a> |
| pz_15_20    | 0 | All returns | Percentage of points calculated for a set of horizontal layers (%)                      | Float | <a href="https://ptompalski.github.io/lidRmetrics/reference/metrics_interval.html">https://ptompalski.github.io/lidRmetrics/reference/metrics_interval.html</a> |
| pz_20_25    | 0 | All returns | Percentage of points calculated for a set of horizontal layers (%)                      | Float | <a href="https://ptompalski.github.io/lidRmetrics/reference/metrics_interval.html">https://ptompalski.github.io/lidRmetrics/reference/metrics_interval.html</a> |
| pz_25_30    | 0 | All returns | Percentage of points calculated for a set of horizontal layers (%)                      | Float | <a href="https://ptompalski.github.io/lidRmetrics/reference/metrics_interval.html">https://ptompalski.github.io/lidRmetrics/reference/metrics_interval.html</a> |
| pz_30_35    | 0 | All returns | Percentage of points calculated for a set of horizontal layers (%)                      | Float | <a href="https://ptompalski.github.io/lidRmetrics/reference/metrics_interval.html">https://ptompalski.github.io/lidRmetrics/reference/metrics_interval.html</a> |
| pz_35_40    | 0 | All returns | Percentage of points calculated for a set of horizontal layers (%)                      | Float | <a href="https://ptompalski.github.io/lidRmetrics/reference/metrics_interval.html">https://ptompalski.github.io/lidRmetrics/reference/metrics_interval.html</a> |
| pz_40_45    | 0 | All returns | Percentage of points calculated for a set of horizontal layers (%)                      | Float | <a href="https://ptompalski.github.io/lidRmetrics/reference/metrics_interval.html">https://ptompalski.github.io/lidRmetrics/reference/metrics_interval.html</a> |
| pz_45_50    | 0 | All returns | Percentage of points calculated for a set of horizontal layers (%)                      | Float | <a href="https://ptompalski.github.io/lidRmetrics/reference/metrics_interval.html">https://ptompalski.github.io/lidRmetrics/reference/metrics_interval.html</a> |
| pz_above_50 | 0 | All returns | Percentage of points calculated for a set of horizontal layers (%)                      | Float | <a href="https://ptompalski.github.io/lidRmetrics/reference/metrics_interval.html">https://ptompalski.github.io/lidRmetrics/reference/metrics_interval.html</a> |
